# Supplementary material for: Trends in the molecular epidemiology and population genetics of emerging Sporothrix species
Source: PubMed Central journal article supplement — Stud Mycol. 2021 Dec 17;100:100129. doi: 10.1016/j.simyco.2021.100129 (PMC8693333; doi:10.1016/j.simyco.2021.100129), 2021-12-17
Supplement: mmc1.pdf [file mmc1.pdf]

## **Trends in the molecular epidemiology and population genetics of emerging *Sporothrix* species.**

Jamile Ambrósio de Carvalho<sup>1,2</sup>, Mathew A. Beale<sup>3</sup>, Ferry Hagen<sup>4,5,6</sup>, Matthew C. Fisher<sup>7</sup>, Rui Kano<sup>8</sup>, Alexandro Bonifaz<sup>9</sup>, Conchita Toriello<sup>10</sup>, Ricardo Negroni<sup>11</sup>, Rossana Sette de Melo Rego<sup>12</sup>, Isabella Dib Ferreira Gremião<sup>13</sup>, Sandro Antonio Pereira<sup>13</sup>, Zoilo Pires de Camargo<sup>1,2</sup>, Anderson Messias Rodrigues<sup>1,2\*</sup>

<sup>1</sup> Laboratory of Emerging Fungal Pathogens, Department of Microbiology, Immunology, and Parasitology, Discipline of Cellular Biology, Federal University of São Paulo (UNIFESP), São Paulo, 04023062, Brazil.

<sup>2</sup> Department of Medicine, Discipline of infectious Diseases, Federal University of São Paulo (UNIFESP), São Paulo, 04023062, Brazil.

<sup>3</sup> Parasites and Microbes Programme, Wellcome Sanger Institute, Wellcome Genome Campus, Hinxton, Cambridgeshire, CB10 1SA, UK.

<sup>4</sup> Department of Medical Mycology, Westerdijk Fungal Biodiversity Institute, Uppsalalaan 8, 3584CT, Utrecht, The Netherlands.

<sup>5</sup> Department of Medical Microbiology, University Medical Center Utrecht, Heidelberglaan 100, 3584 CX, Utrecht, The Netherlands.

<sup>6</sup> Laboratory of Medical Mycology, Jining No. 1 People's Hospital, Jining, Shandong, People's Republic of China.

<sup>7</sup> MRC Center for Global Infectious Disease Analysis, Department of Infectious Disease Epidemiology, School of Public Health, Imperial College London, London W2 1PG, UK.

<sup>8</sup> Department of Veterinary Dermatology, Nihon University College of Bioresource Sciences, Fujisawa, Kanagawa, Japan.

<sup>9</sup> Dermatology Service, Mycology Department, Hospital General de México, "Dr. Eduardo Liceaga", Mexico City, Mexico.

<sup>10</sup> Departamento de Microbiología-Parasitología, Facultad de Medicina, Universidad Nacional Autónoma de México (UNAM), 04510, Mexico City, Mexico.

<sup>11</sup> Mycology Unit of the Infectious Diseases Hospital F.J. Muñiz, Reference Center of Mycology of Buenos Aires City, Buenos Aires, Argentina.

<sup>12</sup> Mycology Division, Associate Pathologists of Pernambuco, Recife, Brazil.

<sup>13</sup> Laboratory of Clinical Research on Dermatозoonoses in Domestic Animals, Evandro Chagas National Institute of Infectious Diseases, Oswaldo Cruz Foundation (Fiocruz), Rio de Janeiro, RJ, Brazil.

\* amrodrigues.amr@gmail.com

**Supplementary Table S1:** Isolate, species, source, clinical form, and origin of 188 *Sporothrix* isolates used in this study.

| Isolate | CBS code   | Species                | Source | Clinical Form | Origin    | MAT    | mtDNA |
|---------|------------|------------------------|--------|---------------|-----------|--------|-------|
| Ss05    | CBS 132985 | <i>S. brasiliensis</i> | Feline | LF            | MG/Brazil | MAT1-1 | 1,157 |
| Ss08    | -          | <i>S. brasiliensis</i> | Human  | LF            | MG/Brazil | MAT1-1 | 1,157 |
| Ss09    | -          | <i>S. brasiliensis</i> | Human  | LF            | MG/Brazil | MAT1-1 | 1,157 |
| Ss14    | -          | <i>S. brasiliensis</i> | Human  | Disseminated  | MG/Brazil | MAT1-2 | 1,157 |
| Ss25    | CBS 132988 | <i>S. brasiliensis</i> | Human  | Fixed         | PR/Brazil | MAT1-2 | 1,157 |
| Ss27    | -          | <i>S. brasiliensis</i> | Human  | LF            | PR/Brazil | MAT1-1 | 1,157 |
| Ss33    | -          | <i>S. brasiliensis</i> | Human  | LF            | PR/Brazil | MAT1-1 | 1,157 |
| Ss34    | -          | <i>S. brasiliensis</i> | Human  | Fixed         | PR/Brazil | MAT1-1 | 1,157 |
| Ss37    | -          | <i>S. brasiliensis</i> | Human  | Fixed         | PR/Brazil | MAT1-2 | 1,157 |
| Ss43    | -          | <i>S. brasiliensis</i> | Human  | Fixed         | CE/Brazil | MAT1-1 | 1,157 |
| Ss53    | CBS 132989 | <i>S. brasiliensis</i> | Feline | LF            | RS/Brazil | MAT1-1 | 1,157 |
| Ss54    | CBS 132990 | <i>S. brasiliensis</i> | Feline | LF            | RS/Brazil | MAT1-1 | 1,157 |
| Ss55    | -          | <i>S. brasiliensis</i> | Human  | LF            | RS/Brazil | MAT1-1 | 1,157 |
| Ss62    | CBS 132991 | <i>S. brasiliensis</i> | Human  | LF            | ES/Brazil | MAT1-1 | 1,157 |
| Ss66    | -          | <i>S. brasiliensis</i> | Human  | Fixed         | RJ/Brazil | MAT1-2 | 1,157 |
| Ss67    | -          | <i>S. brasiliensis</i> | Human  | Fixed         | RJ/Brazil | MAT1-2 | 1,157 |
| Ss95    | -          | <i>S. brasiliensis</i> | Human  | Fixed         | RJ/Brazil | MAT1-2 | 1,157 |
| Ss99    | -          | <i>S. brasiliensis</i> | Human  | LF            | RJ/Brazil | MAT1-2 | 1,157 |
| Ss101   | -          | <i>S. brasiliensis</i> | Human  | LF            | SP/Brazil | MAT1-2 | 1,157 |
| Ss104   | -          | <i>S. brasiliensis</i> | Human  | LF            | MT/Brazil | MAT1-2 | 1,157 |
| Ss128   | -          | <i>S. brasiliensis</i> | Human  | Fixed         | SP/Brazil | MAT1-1 | 1,157 |
| Ss149   | -          | <i>S. brasiliensis</i> | Human  | LF            | RS/Brazil | MAT1-1 | 1,157 |
| Ss151   | CBS 132994 | <i>S. brasiliensis</i> | Canine | LF            | RS/Brazil | MAT1-1 | 1,157 |
| Ss152   | CBS 132995 | <i>S. brasiliensis</i> | Feline | LF            | RS/Brazil | MAT1-1 | 1,157 |
| Ss153   | CBS 132996 | <i>S. brasiliensis</i> | Feline | LF            | RS/Brazil | MAT1-1 | 1,157 |
| Ss154   | -          | <i>S. brasiliensis</i> | Feline | LF            | RS/Brazil | MAT1-1 | 1,157 |
| Ss171   | CBS 132999 | <i>S. brasiliensis</i> | Feline | N/A           | PR/Brazil | MAT1-1 | 1,157 |
| Ss172   | CBS 133000 | <i>S. brasiliensis</i> | Feline | N/A           | PR/Brazil | MAT1-1 | 1,157 |
| Ss174   | CBS 133002 | <i>S. brasiliensis</i> | Feline | N/A           | PR/Brazil | MAT1-1 | 1,157 |
| Ss177   | IPEC 16919 | <i>S. brasiliensis</i> | Human  | N/A           | RJ/Brazil | MAT1-2 | 1,157 |
| Ss178   | CBS 120339 | <i>S. brasiliensis</i> | Human  | N/A           | RJ/Brazil | MAT1-1 | 1,157 |
| Ss226   | CBS 133003 | <i>S. brasiliensis</i> | Feline | N/A           | SP/Brazil | MAT1-2 | 1,157 |
| Ss227   | CBS 133004 | <i>S. brasiliensis</i> | Canine | N/A           | SP/Brazil | MAT1-1 | 1,157 |
| Ss237   | -          | <i>S. brasiliensis</i> | Human  | N/A           | ES/Brazil | MAT1-2 | 1,157 |
| Ss245   | CBS 133005 | <i>S. brasiliensis</i> | Feline | N/A           | RJ/Brazil | MAT1-2 | 1,157 |
| Ss246   | CBS 133002 | <i>S. brasiliensis</i> | Feline | N/A           | RJ/Brazil | MAT1-2 | 1,157 |
| Ss247   | CBS 133006 | <i>S. brasiliensis</i> | Feline | N/A           | RJ/Brazil | MAT1-2 | 1,157 |
| Ss248   | CBS 133007 | <i>S. brasiliensis</i> | Feline | N/A           | RJ/Brazil | MAT1-2 | 1,157 |
| Ss249   | CBS 133008 | <i>S. brasiliensis</i> | Feline | N/A           | RJ/Brazil | MAT1-2 | 1,157 |
| Ss250   | CBS 133009 | <i>S. brasiliensis</i> | Feline | N/A           | RJ/Brazil | MAT1-2 | 1,157 |
| Ss251   | CBS 133010 | <i>S. brasiliensis</i> | Feline | N/A           | RJ/Brazil | MAT1-2 | 1,157 |
| Ss252   | CBS 133011 | <i>S. brasiliensis</i> | Feline | N/A           | RJ/Brazil | MAT1-2 | 1,157 |

| Isolate | CBS code   | Species                   | Source | Clinical Form | Origin        | MAT    | mtDNA |
|---------|------------|---------------------------|--------|---------------|---------------|--------|-------|
| Ss256   | CBS 133015 | <i>S. brasiliensis</i>    | Feline | N/A           | RJ/Brazil     | MAT1-2 | 1,157 |
| Ss261   | -          | <i>S. brasiliensis</i>    | Human  | N/A           | RS/Brazil     | MAT1-1 | 1,157 |
| Ss265   | CBS 133020 | <i>S. brasiliensis</i>    | Human  | N/A           | MG/Brazil     | MAT1-1 | 1,157 |
| Ss292   | -          | <i>S. brasiliensis</i>    | Feline | N/A           | SP/Brazil     | MAT1-2 | 1,157 |
| Ss293   | -          | <i>S. brasiliensis</i>    | Feline | N/A           | SP/Brazil     | MAT1-2 | 1,157 |
| Ss294   | -          | <i>S. brasiliensis</i>    | Feline | N/A           | SP/Brazil     | MAT1-1 | 1,157 |
| Ss295   | -          | <i>S. brasiliensis</i>    | Feline | N/A           | SP/Brazil     | MAT1-1 | 1,157 |
| Ss319   | -          | <i>S. brasiliensis</i>    | Feline | N/A           | RS/Brazil     | MAT1-1 | 1,157 |
| Ss328   | -          | <i>S. brasiliensis</i>    | N/A    | N/A           | RS/Brazil     | MAT1-2 | 1,157 |
| Ss330   | -          | <i>S. brasiliensis</i>    | Feline | N/A           | SP/Brazil     | MAT1-1 | 1,157 |
| Ss392   | -          | <i>S. brasiliensis</i>    | N/A    | N/A           | RJ/Brazil     | MAT1-2 | 1,157 |
| Ss402   | -          | <i>S. brasiliensis</i>    | N/A    | N/A           | RJ/Brazil     | MAT1-2 | 1,157 |
| Ss473   | -          | <i>S. brasiliensis</i>    | N/A    | N/A           | RJ/Brazil     | MAT1-2 | 1,157 |
| Ss607   | -          | <i>S. brasiliensis</i>    | Human  | LF            | PE/Brazil     | MAT1-2 | 1,157 |
| Ss608   | -          | <i>S. brasiliensis</i>    | Human  | LF            | PE/Brazil     | MAT1-2 | 1,157 |
| Ss609   | -          | <i>S. brasiliensis</i>    | Human  | LF            | PE/Brazil     | MAT1-2 | 1,157 |
| Ss610   | -          | <i>S. brasiliensis</i>    | Human  | LF            | PE/Brazil     | MAT1-2 | 1,157 |
| Ss611   | -          | <i>S. brasiliensis</i>    | Human  | LF            | PE/Brazil     | MAT1-2 | 1,157 |
| Ss612   | -          | <i>S. brasiliensis</i>    | Human  | LF            | PE/Brazil     | MAT1-2 | 1,157 |
| Ss613   | -          | <i>S. brasiliensis</i>    | Human  | LF            | PE/Brazil     | MAT1-2 | 1,157 |
| Ss614   | -          | <i>S. brasiliensis</i>    | Human  | LF            | PE/Brazil     | MAT1-2 | 1,157 |
| Ss615   | -          | <i>S. brasiliensis</i>    | Human  | LF            | PE/Brazil     | MAT1-2 | 1,157 |
| Ss616   | -          | <i>S. brasiliensis</i>    | Human  | LF            | PE/Brazil     | MAT1-2 | 1,157 |
| Ss634   | -          | <i>S. brasiliensis</i>    | Feline | N/A           | SP/Brazil     | MAT1-2 | 1,157 |
| Ss654   | -          | <i>S. brasiliensis</i>    | Feline | N/A           | SP/Brazil     | MAT1-2 | 1,157 |
| Ss742   | -          | <i>S. brasiliensis</i>    | N/A    | N/A           | MG/Brazil     | MAT1-1 | 1,157 |
| Ss743   | -          | <i>S. brasiliensis</i>    | N/A    | N/A           | MG/Brazil     | MAT1-1 | 1,157 |
| 26925   | -          | <i>S. brasiliensis</i>    | Feline | N/A           | PR/Brazil     | MAT1-2 | 1,157 |
| 26926   | -          | <i>S. brasiliensis</i>    | Feline | N/A           | PR/Brazil     | MAT1-2 | 1,157 |
| 27390   | -          | <i>S. brasiliensis</i>    | Feline | N/A           | PR/Brazil     | MAT1-2 | 1,157 |
| Ss289   | CBS 110895 | <i>S. brunneoviolacea</i> | Roots  | N/A           | Austria       | -      | -     |
| Ss291   | CBS 124561 | <i>S. brunneoviolacea</i> | Soil   | N/A           | Spain         | -      | -     |
| Ss469   | CBS 139891 | <i>S. chilensis</i>       | Human  | N/A           | Chile         | -      | -     |
| Ss470   | CBS 139890 | <i>S. chilensis</i>       | Soil   | N/A           | Chile         | -      | -     |
| Ss286   | CBS 125442 | <i>S. dimorphospora</i>   | Soil   | N/A           | Spain         | -      | -     |
| Ss288   | CBS 125439 | <i>S. dimorphospora</i>   | Soil   | N/A           | United States | -      | -     |
| Ss06    | CBS 132922 | <i>S. globosa</i>         | Human  | Fixed         | MG/Brazil     | MAT1-1 | 557   |
| Ss41    | CBS 132923 | <i>S. globosa</i>         | Human  | Fixed         | CE/Brazil     | MAT1-2 | 557   |
| Ss49    | CBS 132924 | <i>S. globosa</i>         | Human  | LF            | GO/Brazil     | MAT1-2 | 557   |
| Ss179   | CBS 120340 | <i>S. globosa</i>         | Human  | N/A           | Spain         | MAT1-2 | 557   |
| Ss180   | CBS 130104 | <i>S. globosa</i>         | Human  | N/A           | Spain         | MAT1-1 | 557   |
| Ss211   | -          | <i>S. globosa</i>         | Human  | N/A           | SP/Brazil     | MAT1-1 | 557   |
| Ss236   | CBS 132925 | <i>S. globosa</i>         | Human  | N/A           | MG/Brazil     | MAT1-2 | 557   |
| Ss376   | -          | <i>S. globosa</i>         | Human  | N/A           | ES/Brazil     | MAT1-1 | 557   |
| Ss443   | -          | <i>S. globosa</i>         | Human  | N/A           | Venezuela     | MAT1-1 | 557   |

| Isolate | CBS code   | Species             | Source  | Clinical Form | Origin    | MAT    | mtDNA |
|---------|------------|---------------------|---------|---------------|-----------|--------|-------|
| Ss444   | -          | <i>S. globosa</i>   | Human   | N/A           | Venezuela | MAT1-2 | 557   |
| Ss445   | -          | <i>S. globosa</i>   | Human   | N/A           | Venezuela | MAT1-1 | 557   |
| Ss446   | -          | <i>S. globosa</i>   | Human   | N/A           | Venezuela | MAT1-1 | 557   |
| Ss448   | -          | <i>S. globosa</i>   | Human   | N/A           | Venezuela | MAT1-1 | 557   |
| Ss449   | -          | <i>S. globosa</i>   | Human   | N/A           | Venezuela | MAT1-1 | 557   |
| Ss456   | -          | <i>S. globosa</i>   | Human   | N/A           | Venezuela | MAT1-1 | 557   |
| Ss457   | -          | <i>S. globosa</i>   | Human   | N/A           | Venezuela | MAT1-1 | 557   |
| Ss460   | -          | <i>S. globosa</i>   | Human   | N/A           | Venezuela | MAT1-1 | 557   |
| Ss467   | -          | <i>S. globosa</i>   | Human   | N/A           | SP/Brazil | MAT1-1 | 557   |
| Ss471   | -          | <i>S. globosa</i>   | Human   | N/A           | Chile     | MAT1-2 | 557   |
| Ss472   | -          | <i>S. globosa</i>   | Human   | N/A           | Chile     | MAT1-2 | 557   |
| Ss489   | -          | <i>S. globosa</i>   | Human   | N/A           | Mexico    | MAT1-1 | 557   |
| Ss492   | -          | <i>S. globosa</i>   | Human   | N/A           | Argentina | MAT1-1 | 557   |
| Ss520   | -          | <i>S. globosa</i>   | Human   | N/A           | RJ/Brazil | MAT1-1 | 557   |
| Ss521   | -          | <i>S. globosa</i>   | Human   | N/A           | RS/Brazil | MAT1-1 | 557   |
| Ss522   | -          | <i>S. globosa</i>   | Human   | N/A           | RS/Brazil | MAT1-2 | 557   |
| Ss524   | -          | <i>S. globosa</i>   | Human   | N/A           | RS/Brazil | MAT1-1 | 557   |
| Ss525   | -          | <i>S. globosa</i>   | Human   | N/A           | RS/Brazil | MAT1-1 | 557   |
| Ss545   | -          | <i>S. globosa</i>   | Human   | N/A           | Mexico    | MAT1-1 | 557   |
| Ss583   | CBS 140866 | <i>S. globosa</i>   | Human   | N/A           | Japan     | MAT1-1 | 557   |
| Ss584   | CBS 140867 | <i>S. globosa</i>   | Human   | N/A           | Japan     | MAT1-1 | 557   |
| Ss585   | CBS 140868 | <i>S. globosa</i>   | Human   | N/A           | Japan     | MAT1-1 | 557   |
| Ss586   | -          | <i>S. globosa</i>   | Human   | N/A           | Japan     | MAT1-2 | 557   |
| Ss587   | -          | <i>S. globosa</i>   | Human   | N/A           | Japan     | MAT1-1 | 557   |
| Ss588   | -          | <i>S. globosa</i>   | Human   | N/A           | Japan     | MAT1-2 | 557   |
| Ss187   | CBS 937.72 | <i>S. luriei</i>    | Human   | N/A           | Africa    | MAT1-1 | 1,157 |
| Ss132   | CBS 132927 | <i>S. mexicana</i>  | Human   | LF            | PE/Brazil | -      | -     |
| Ss133   | CBS 132928 | <i>S. mexicana</i>  | Human   | LF            | PE/Brazil | -      | -     |
| Ss181   | CBS 120342 | <i>S. mexicana</i>  | Vegetal | Environmental | Mexico    | -      | -     |
| Ss182   | CBS 120341 | <i>S. mexicana</i>  | Soil    | Environmental | Mexico    | -      | -     |
| Ss184   | FMR 8803   | <i>S. pallida</i>   | Insect  | Environmental | China     | -      | -     |
| Ss327   | -          | <i>S. pallida</i>   | N/A     | N/A           | RS/Brazil | -      | -     |
| Ss589   | -          | <i>S. pallida</i>   | N/A     | N/A           | Chile     | -      | -     |
| Ss01    | CBS 132961 | <i>S. schenckii</i> | Feline  | LF            | SP/Brazil | MAT1-2 | 557   |
| Ss03    | CBS 132963 | <i>S. schenckii</i> | Human   | Fixed         | RS/Brazil | MAT1-2 | 1,157 |
| Ss04    | -          | <i>S. schenckii</i> | Human   | Fixed         | RS/Brazil | MAT1-2 | 1,157 |
| Ss13    | -          | <i>S. schenckii</i> | Human   | LF            | MG/Brazil | MAT1-2 | 557   |
| Ss16    | -          | <i>S. schenckii</i> | Human   | LF            | PI/Brazil | MAT1-1 | 1,157 |
| Ss17    | -          | <i>S. schenckii</i> | Human   | Fixed         | PR/Brazil | MAT1-2 | 557   |
| Ss36    | -          | <i>S. schenckii</i> | Human   | LF            | PR/Brazil | MAT1-2 | 557   |
| Ss39    | -          | <i>S. schenckii</i> | Human   | Fixed         | PR/Brazil | MAT1-2 | 1,157 |
| Ss40    | -          | <i>S. schenckii</i> | Human   | Fixed         | CE/Brazil | MAT1-2 | 557   |
| Ss47    | -          | <i>S. schenckii</i> | Human   | LF            | GO/Brazil | MAT1-2 | 1,157 |
| Ss50    | -          | <i>S. schenckii</i> | Human   | LF            | GO/Brazil | MAT1-1 | 1,157 |
| Ss51    | -          | <i>S. schenckii</i> | Human   | Fixed         | PA/Brazil | MAT1-1 | 1,157 |

| Isolate | CBS code   | Species             | Source  | Clinical Form | Origin        | MAT    | mtDNA |
|---------|------------|---------------------|---------|---------------|---------------|--------|-------|
| Ss58    | -          | <i>S. schenckii</i> | Human   | Fixed         | SP/Brazil     | MAT1-2 | 557   |
| Ss61    | -          | <i>S. schenckii</i> | Soil    | Environmental | SP/Brazil     | MAT1-1 | 557   |
| Ss63    | CBS 132968 | <i>S. schenckii</i> | Human   | LF            | ES/Brazil     | MAT1-2 | 557   |
| Ss90    | -          | <i>S. schenckii</i> | Human   | Fixed         | RJ/Brazil     | MAT1-1 | 557   |
| Ss105   | -          | <i>S. schenckii</i> | Human   | LF            | MG/Brazil     | MAT1-1 | 1,157 |
| Ss107   | -          | <i>S. schenckii</i> | Human   | LF            | MG/Brazil     | MAT1-2 | 1,157 |
| Ss110   | -          | <i>S. schenckii</i> | Human   | Fixed         | MG/Brazil     | MAT1-2 | 1,157 |
| Ss122   | -          | <i>S. schenckii</i> | Human   | Fixed         | SP/Brazil     | MAT1-1 | 557   |
| Ss126   | -          | <i>S. schenckii</i> | Human   | Fixed         | SP/Brazil     | MAT1-2 | 557   |
| Ss130   | -          | <i>S. schenckii</i> | Human   | LF            | PE/Brazil     | MAT1-1 | 1,157 |
| Ss137   | -          | <i>S. schenckii</i> | Human   | LF            | PE/Brazil     | MAT1-1 | 557   |
| Ss138   | -          | <i>S. schenckii</i> | Human   | LF            | PB/Brazil     | MAT1-2 | 557   |
| Ss141   | CBS 132975 | <i>S. schenckii</i> | Human   | LF            | DF/Brazil     | MAT1-1 | 557   |
| Ss143   | -          | <i>S. schenckii</i> | Human   | LF            | PA/Brazil     | MAT1-1 | 557   |
| Ss158   | -          | <i>S. schenckii</i> | Human   | Fixed         | AM/Brazil     | MAT1-2 | 557   |
| Ss159   | CBS 132976 | <i>S. schenckii</i> | Human   | LF            | Japan         | MAT1-2 | 1,157 |
| Ss160   | -          | <i>S. schenckii</i> | Human   | LF            | Mexico        | MAT1-1 | 557   |
| Ss161   | -          | <i>S. schenckii</i> | Human   | LF            | Mexico        | MAT1-2 | 557   |
| Ss162   | CBS 132977 | <i>S. schenckii</i> | Vegetal | Environmental | Mexico        | MAT1-2 | 1,157 |
| Ss163   | -          | <i>S. schenckii</i> | Human   | Fixed         | Peru          | MAT1-2 | 1,157 |
| Ss164   | -          | <i>S. schenckii</i> | Human   | Fixed         | Peru          | MAT1-2 | 557   |
| Ss167   | CBS 132978 | <i>S. schenckii</i> | Soil    | Environmental | Peru          | MAT1-2 | 1,157 |
| Ss175   | -          | <i>S. schenckii</i> | Human   | N/A           | Italy         | MAT1-2 | 557   |
| Ss185   | CBS 359.36 | <i>S. schenckii</i> | Human   | N/A           | United States | MAT1-1 | 557   |
| Ss192   | -          | <i>S. schenckii</i> | Human   | N/A           | SP/Brazil     | MAT1-1 | -     |
| Ss193   | -          | <i>S. schenckii</i> | Human   | N/A           | SP/Brazil     | MAT1-2 | 1,157 |
| Ss194   | -          | <i>S. schenckii</i> | Human   | N/A           | SP/Brazil     | MAT1-2 | -     |
| Ss200   | CBS 132982 | <i>S. schenckii</i> | Human   | N/A           | SP/Brazil     | MAT1-2 | 557   |
| Ss202   | -          | <i>S. schenckii</i> | Human   | N/A           | SP/Brazil     | MAT1-2 | 557   |
| Ss207   | -          | <i>S. schenckii</i> | Human   | N/A           | SP/Brazil     | MAT1-1 | 557   |
| Ss208   | -          | <i>S. schenckii</i> | Human   | N/A           | SP/Brazil     | MAT1-1 | 557   |
| Ss209   | -          | <i>S. schenckii</i> | Human   | N/A           | SP/Brazil     | MAT1-2 | 557   |
| Ss210   | -          | <i>S. schenckii</i> | Human   | N/A           | SP/Brazil     | MAT1-2 | 557   |
| Ss212   | -          | <i>S. schenckii</i> | Human   | N/A           | SP/Brazil     | MAT1-1 | 557   |
| Ss213   | -          | <i>S. schenckii</i> | Human   | N/A           | SP/Brazil     | MAT1-2 | 557   |
| Ss214   | -          | <i>S. schenckii</i> | Human   | N/A           | SP/Brazil     | MAT1-1 | -     |
| Ss452   | -          | <i>S. schenckii</i> | Human   | N/A           | Venezuela     | MAT1-1 | 557   |
| Ss453   | -          | <i>S. schenckii</i> | Human   | N/A           | Venezuela     | MAT1-1 | 557   |
| Ss454   | -          | <i>S. schenckii</i> | Human   | N/A           | Venezuela     | MAT1-1 | 557   |
| Ss455   | -          | <i>S. schenckii</i> | Human   | N/A           | Venezuela     | MAT1-1 | 557   |
| Ss459   | -          | <i>S. schenckii</i> | Human   | N/A           | Venezuela     | MAT1-1 | 557   |
| Ss465   | -          | <i>S. schenckii</i> | Human   | N/A           | Venezuela     | MAT1-1 | 557   |
| Ss476   | -          | <i>S. schenckii</i> | Human   | N/A           | Mexico        | MAT1-1 | 557   |
| Ss479   | -          | <i>S. schenckii</i> | Human   | N/A           | Mexico        | MAT1-1 | 557   |
| Ss480   | -          | <i>S. schenckii</i> | Human   | N/A           | Mexico        | MAT1-2 | 557   |

| Isolate | CBS code | Species              | Source | Clinical Form | Origin    | MAT    | mtDNA |
|---------|----------|----------------------|--------|---------------|-----------|--------|-------|
| Ss482   | -        | <i>S. schenckii</i>  | Human  | N/A           | Mexico    | MAT1-2 | 557   |
| Ss493   | -        | <i>S. schenckii</i>  | Human  | N/A           | Argentina | MAT1-2 | 1,157 |
| Ss495   | -        | <i>S. schenckii</i>  | Human  | N/A           | Argentina | MAT1-2 | 557   |
| Ss496   | -        | <i>S. schenckii</i>  | Human  | N/A           | Uruguay   | MAT1-2 | 557   |
| Ss499   | -        | <i>S. schenckii</i>  | Human  | N/A           | Argentina | MAT1-1 | 1,157 |
| Ss526   | -        | <i>S. schenckii</i>  | Human  | N/A           | Mexico    | MAT1-2 | 557   |
| Ss527   | -        | <i>S. schenckii</i>  | Human  | N/A           | Mexico    | MAT1-2 | 557   |
| Ss554   | -        | <i>S. schenckii</i>  | Human  | N/A           | Mexico    | MAT1-2 | 557   |
| Ss597   | -        | <i>S. schenckii</i>  | Human  | N/A           | ES/Brazil | MAT1-2 | 557   |
| Ss696   | -        | <i>S. schenckii</i>  | Human  | N/A           | ES/Brazil | MAT1-2 | 557   |
| Ss329   | -        | <i>S. stenoceras</i> | Human  | N/A           | RS/Brazil | -      | -     |

LF: Lymphocutaneous sporotrichosis. AM: Amazonas; CE: Ceará; DF: Federal District; ES: Espírito Santo; GO: Goiás; MG: Minas Gerais; MT: Mato Grosso; PA: Pará; PB: Paraíba; PE: Pernambuco; PI: Piauí; PR: Paraná; RJ: Rio de Janeiro; RS: Rio Grande do Sul; SP: São Paulo.

**Supplementary Table S2.** Cluster similarities among the three combinations evaluated for the isolates from clinical clade.

| Species                | Subclade            | AFLP combination #3 |     |                 | AFLP combination #5 |    |                 | AFLP combination #6 |                 |                 |
|------------------------|---------------------|---------------------|-----|-----------------|---------------------|----|-----------------|---------------------|-----------------|-----------------|
|                        |                     | N                   | CC  | Similarity      | N                   | CC | Similarity      | N                   | CC              | Similarity      |
| <i>S. brasiliensis</i> | -                   | 72                  | 88  | 46.913% ± 4.43% | 72                  | 90 | 46.913% ± 4.43% | 72                  | 93              | 29.920% ± 4.05% |
|                        | Ia                  | 4                   | 70  | 65.173% ± 2.63% | 4                   | 84 | 75.520% ± 2.91% | 30                  | 92              | 65.580% ± 2.70% |
|                        | Ib                  | 28                  | 86  | 74.840% ± 4.97% | 24                  | 89 | 74.193% ± 2.37% | 18                  | 92              | 68.687% ± 4.13% |
|                        | Ic                  | 3                   | 100 | 68.487% ± 0.56% | 4                   | 80 | 79.500% ± 3.19% | 3                   | 99              | 65.527% ± 1-14% |
|                        | Id                  | 13                  | 78  | 65.620% ± 6.87% | 19                  | 89 | 66.240% ± 5.23% | 6                   | 96              | 62.287% ± 1.94% |
|                        | Ie                  | 4                   | 98  | 91.320% ± 0.30% | 3                   | 97 | 67.506% ± 1.89% | 2                   | 99              | 63.247% ± 0.00% |
|                        | If                  | 5                   | 77  | 76.480% ± 2.76% | 2                   | 89 | 79.786% ± 0.00% | 4                   | 99              | 80.460% ± 0.93% |
|                        | Ig                  | 2                   | 88  | 68.253% ± 0.00% | 6                   | 98 | 63.606% ± 0.81% | 2                   | 100             | 67.840% ± 0.00% |
|                        | Ih                  | 2                   | 98  | 65.973% ± 0.00% | 6                   | 94 | 66.013% ± 3.58% | 2                   | 95              | 75.320% ± 0.00% |
|                        | Ii                  | 2                   | 98  | 89.200% ± 0.00% | 2                   | 88 | 70.313% ± 0.00% | -                   | -               | -               |
|                        | Ij                  | 3                   | 81  | 90.147% ± 1.31% | -                   | -  | -               | -                   | -               | -               |
|                        | Ik                  | 2                   | 88  | 78.247% ± 0.00% | -                   | -  | -               | -                   | -               | -               |
|                        | <i>S. schenckii</i> | -                   | 66  | 87              | 31.766% ± 5.33%     | 66 | 83              | 31.766% ± 5.33%     | 66              | 87              |
| IIa                    |                     | 7                   | 84  | 67.287% ± 4.63% | 21                  | 86 | 62.053% ± 3.25% | 2                   | 100             | 72.207% ± 0.00% |
| IIb                    |                     | 6                   | 78  | 80.533% ± 1-24% | 4                   | 70 | 73.620% ± 1.67% | 5                   | 66              | 67.727% ± 4.11% |
| IIc                    |                     | 3                   | 53  | 69.227% ± 5.27% | 2                   | 88 | 75.833% ± 0.00% | 5                   | 68              | 61.067% ± 3.86% |
| IId                    |                     | 3                   | 95  | 63.953% ± 2.12% | 10                  | 92 | 61.133% ± 4.16% | 3                   | 62              | 62.754% ± 3.27% |
| IIe                    |                     | 5                   | 83  | 62.140% ± 0.70% | 2                   | 91 | 77.180% ± 0.00% | 6                   | 85              | 63.880% ± 3.49% |
| IIf                    |                     | 2                   | 85  | 64.867% ± 0.00% | 2                   | 88 | 74.106% ± 0.00% | 3                   | 91              | 62.094% ± 1.57% |
| IIg                    |                     | 2                   | 93  | 65.873% ± 0.00% | 3                   | 71 | 65.680% ± 1.37% | 2                   | 90              | 63.380% ± 0.00% |
| IIh                    |                     | 3                   | 86  | 73.493% ± 1.35% | 8                   | 76 | 60.726% ± 3.89% | 2                   | 90              | 63.487% ± 0.00% |
| IIi                    |                     | 2                   | 75  | 76.167% ± 0.00% | 4                   | 85 | 60.206% ± 4.63% | 4                   | 95              | 63.167% ± 0.95% |
| IIj                    |                     | 4                   | 94  | 64.520% ± 1.31% | -                   | -  | -               | 2                   | 95              | 68.634% ± 0.00% |
| IIk                    |                     | 2                   | 71  | 65.287% ± 0.00% | -                   | -  | -               | 3                   | 88              | 61.547% ± 1-21% |
| IIl                    |                     | 2                   | 99  | 73.300% ± 0.00% | -                   | -  | -               | 2                   | 99              | 65.240% ± 0.00% |
| IIm                    |                     | 10                  | 92  | 62.620% ± 3.57% | -                   | -  | -               | 2                   | 99              | 90.120% ± 0.00% |
| IIn                    |                     | -                   | -   | -               | -                   | -  | -               | 11                  | 80              | 61.427% ± 8.63% |
| IIo                    | -                   | -                   | -   | -               | -                   | -  | 2               | 86                  | 70.794% ± 0.00% |                 |
| <i>S. globosa</i>      | -                   | 34                  | 97  | 38.780% ± 4.29% | 34                  | 93 | 38.780% ± 4.29% | 34                  | 93              | 42.007% ± 5.45% |
|                        | IIIa                | 24                  | 87  | 76.373% ± 4.27% | 24                  | 83 | 65.726% ± 5.85% | 27                  | 87              | 58.040% ± 5.14% |
|                        | IIIb                | 2                   | 94  | 78.753% ± 0.00% | 2                   | 88 | 75.680% ± 0.00% | 2                   | 98              | 80.180% ± 0.00% |
|                        | IIIc                | 6                   | 99  | 69.027% ± 1.57% | 6                   | 91 | 63.673% ± 4.27% | -                   | -               | -               |

N: number of isolates; CC: Cophenetic correlation coefficient.

**Supplementary Table S3:** Descriptive statistics of AFLP markers #3, #5 and #6 *in vitro*.

| <b>AFLP</b>          | <b>Genetic group/ species</b> | <i>S. brasiliensis</i> | <i>S. schenckii</i> | <i>S. globosa</i> | <i>S. chilensis</i> | <i>S. mexicana</i> | <i>S. pallida</i> | <i>S. dimorphos.</i> | <i>S. brunneo.</i> |
|----------------------|-------------------------------|------------------------|---------------------|-------------------|---------------------|--------------------|-------------------|----------------------|--------------------|
| #3 EcoRI- GA/MseI-TT | Number of isolates            | 72                     | 67                  | 34                | 2                   | 4                  | 3                 | 2                    | 2                  |
|                      | Minimum (fragment)            | 15                     | 11                  | 17                | 17                  | 15                 | 17                | 21                   | 19                 |
|                      | 10% Percentile (fragments)    | 21                     | 15                  | 20.5              | 17                  | 15                 | 17                | 21                   | 19                 |
|                      | 25% Percentile (fragments)    | 22.25                  | 19                  | 22                | 17                  | 15.25              | 17                | 21                   | 19                 |
|                      | Median (fragments)            | 26                     | 21                  | 23                | 20.5                | 16.5               | 19                | 21                   | 22                 |
|                      | 75% Percentile (fragments)    | 27.75                  | 24                  | 24                | 24                  | 21.5               | 36                | 21                   | 25                 |
|                      | 90% Percentile (fragments)    | 29                     | 27.2                | 30                | 24                  | 23                 | 36                | 21                   | 25                 |
|                      | Maximum (fragments)           | 47                     | 32                  | 38                | 24                  | 23                 | 36                | 21                   | 25                 |
|                      | Mean (fragments)              | 25.47                  | 21.27               | 24.03             | 20.5                | 17.75              | 24                | 21                   | 22                 |
|                      | Standard Deviation            | 4.615                  | 4.273               | 4.232             | 4.95                | 3.594              | 10.44             | 0                    | 4.243              |
|                      | Standard Error of Mean        | 0.5438                 | 0.5221              | 0.7257            | 3.5                 | 1.797              | 6.028             | 0                    | 3                  |
|                      | Lower 95% CI of mean          | 25                     | 20                  | 22                | 17                  | 15                 | 17                | 21                   | 19                 |
|                      | Upper 95% CI of mean          | 27                     | 22                  | 24                | 24                  | 23                 | 36                | 21                   | 25                 |
|                      | Coefficient of variation      | 18.12%                 | 20.09%              | 17.61%            | 24.15%              | 20.25%             | 43.50%            | 0.000%               | 19.28%             |
| Geometric mean       | 25.08                         | 20.84                  | 23.71               | 20.2              | 17.5                | 22.66              | 21                | 21.79                |                    |
| <b>AFLP</b>          | <b>Genetic group/ species</b> | <i>S. brasiliensis</i> | <i>S. schenckii</i> | <i>S. globosa</i> | <i>S. chilensis</i> | <i>S. mexicana</i> | <i>S. pallida</i> | <i>S. dimorphos.</i> | <i>S. brunneo.</i> |
| #5 EcoRI -GA/MseI-AG | Number of isolates            | 72                     | 67                  | 34                | 2                   | 4                  | 3                 | 2                    | 2                  |
|                      | Minimum (fragments)           | 15                     | 12                  | 16                | 31                  | 19                 | 23                | 17                   | 20                 |
|                      | 10% Percentile (fragments)    | 20                     | 14.8                | 19                | 31                  | 19                 | 23                | 17                   | 20                 |
|                      | 25% Percentile (fragments)    | 22                     | 18                  | 20                | 31                  | 19.25              | 23                | 17                   | 20                 |
|                      | Median (fragments)            | 24                     | 24                  | 22                | 32                  | 23                 | 23                | 19                   | 28                 |
|                      | 75% Percentile (fragments)    | 26                     | 27                  | 24.25             | 33                  | 26                 | 26                | 21                   | 36                 |
|                      | 90% Percentile (fragments)    | 29.7                   | 31                  | 26.5              | 33                  | 26                 | 26                | 21                   | 36                 |
|                      | Maximum (fragments)           | 39                     | 33                  | 30                | 33                  | 26                 | 26                | 21                   | 36                 |
|                      | Mean                          | 24.29                  | 23.15               | 22.47             | 32                  | 22.75              | 24                | 19                   | 28                 |
|                      | Standard Deviation            | 3.686                  | 5.666               | 2.977             | 1.414               | 3.775              | 1.732             | 2.828                | 11.31              |
|                      | Standard Error of Mean        | 0.4345                 | 0.6922              | 0.5106            | 1                   | 1.887              | 1                 | 2                    | 8                  |
| Lower 95% CI of mean | 23                            | 23                     | 21                  | 31                | 19                  | 23                 | 17                | 20                   |                    |



|             |                               |                               |                            |                          |                            |                           |                          |                             |                           |
|-------------|-------------------------------|-------------------------------|----------------------------|--------------------------|----------------------------|---------------------------|--------------------------|-----------------------------|---------------------------|
|             | Upper 95% CI of mean          | 24                            | 25                         | 24                       | 33                         | 26                        | 26                       | 21                          | 36                        |
|             | Coefficient of variation      | 15.18%                        | 24.47%                     | 13.25%                   | 4.419%                     | 16.59%                    | 7.217%                   | 14.89%                      | 40.41%                    |
|             | Geometric mean                | 24.03                         | 22.39                      | 22.28                    | 31.98                      | 22.51                     | 23.96                    | 18.89                       | 26.83                     |
| <b>AFLP</b> | <b>Genetic group/ species</b> | <b><i>S. brasiliensis</i></b> | <b><i>S. schenckii</i></b> | <b><i>S. globosa</i></b> | <b><i>S. chilensis</i></b> | <b><i>S. mexicana</i></b> | <b><i>S. pallida</i></b> | <b><i>S. dimorphos.</i></b> | <b><i>S. brunneo.</i></b> |
|             | Number of isolates            | 72                            | 67                         | 34                       | 2                          | 4                         | 3                        | 2                           | 2                         |
|             | Minimum (fragments)           | 9                             | 8                          | 8                        | 13                         | 11                        | 14                       | 19                          | 19                        |
|             | 10% Percentile (fragments)    | 12                            | 13                         | 9                        | 13                         | 11                        | 14                       | 19                          | 19                        |
|             | 25% Percentile (fragments)    | 12                            | 16                         | 10                       | 13                         | 11.25                     | 14                       | 19                          | 19                        |
|             | Median (fragments)            | 14                            | 18                         | 10.5                     | 13                         | 12.5                      | 14                       | 21.5                        | 23.5                      |
|             | 75% Percentile (fragments)    | 15                            | 20                         | 12.25                    | 13                         | 13.75                     | 16                       | 24                          | 28                        |
|             | 90% Percentile (fragments)    | 19                            | 22                         | 16                       | 13                         | 14                        | 16                       | 24                          | 28                        |
|             | Maximum (fragments)           | 23                            | 25                         | 19                       | 13                         | 14                        | 16                       | 24                          | 28                        |
|             | Mean                          | 14.47                         | 17.61                      | 11.5                     | 13                         | 12.5                      | 14.67                    | 21.5                        | 23.5                      |
|             | Standard Deviation            | 2.793                         | 3.357                      | 2.766                    | 0                          | 1.291                     | 1.155                    | 3.536                       | 6.364                     |
|             | Standard Error of Mean        | 0.3292                        | 0.4102                     | 0.4744                   | 0                          | 0.6455                    | 0.6667                   | 2.5                         | 4.5                       |
|             | Lower 95% CI of mean          | 13                            | 17                         | 10                       | 13                         | 11                        | 14                       | 19                          | 19                        |
|             | Upper 95% CI of mean          | 15                            | 19                         | 12                       | 13                         | 14                        | 16                       | 24                          | 28                        |
|             | Coefficient of variation      | 19.30%                        | 19.06%                     | 24.05%                   | 0.000%                     | 10.33%                    | 7.873%                   | 16.44%                      | 27.08%                    |
|             | Geometric mean                | 14.23                         | 17.27                      | 11.22                    | 13                         | 12.45                     | 14.64                    | 21.35                       | 23.07                     |

#6 EcoRI -TA/MseI-AA

**Supplementary Table S4.** Polymorphic statistics calculated for three combinations of selective primers for the subclades of *S. brasiliensis*, *S. schenckii*, and *S. globosa*.

| <b>#1 EcoRI-GA/MseI-TT</b> |                     |          |                  |          |            |          |             |           |          |           |        |
|----------------------------|---------------------|----------|------------------|----------|------------|----------|-------------|-----------|----------|-----------|--------|
| <b>Species</b>             | <b>Subclade</b>     | <b>n</b> | <b>Fragments</b> | <b>H</b> | <b>PIC</b> | <b>E</b> | <b>Havp</b> | <b>MI</b> | <b>D</b> | <b>Rp</b> |        |
| <i>S. brasiliensis</i>     | Ia                  | 27       | 38               | 0.4292   | 0.3371     | 26.1481  | 0.0004      | 0.0109    | 0.5267   | 5.4074    |        |
|                            | Ib                  | 2        | 37               | 0.0526   | 0.0512     | 36.0000  | 0.0007      | 0.0256    | 0.0537   | 2.0000    |        |
|                            | Ic                  | 3        | 28               | 0.3084   | 0.2608     | 22.6667  | 0.0037      | 0.0832    | 0.3465   | 6.0000    |        |
|                            | Id                  | 8        | 31               | 0.3943   | 0.3166     | 22.6250  | 0.0016      | 0.0360    | 0.4681   | 5.2500    |        |
|                            | Ie                  | 2        | 19               | 0.2285   | 0.2024     | 16.5000  | 0.0060      | 0.0992    | 0.2489   | 5.0000    |        |
|                            | If                  | 2        | 26               | 0.2604   | 0.2265     | 22.0000  | 0.0050      | 0.1102    | 0.2866   | 8.0000    |        |
|                            | Ig                  | 5        | 30               | 0.1692   | 0.1549     | 27.2000  | 0.0011      | 0.0307    | 0.1785   | 4.0000    |        |
|                            | Ih                  | 5        | 28               | 0.2841   | 0.2437     | 23.2000  | 0.0020      | 0.0471    | 0.3145   | 4.4000    |        |
|                            | Ii                  | 2        | 24               | 0.1866   | 0.1692     | 21.5000  | 0.0039      | 0.0836    | 0.1995   | 5.0000    |        |
|                            | Ij                  | 2        | 28               | 0.0689   | 0.0665     | 27.0000  | 0.0012      | 0.0332    | 0.0708   | 2.0000    |        |
|                            | Ik                  | 3        | 26               | 0.0740   | 0.0712     | 25.0000  | 0.0009      | 0.0237    | 0.0759   | 2.0000    |        |
|                            | <i>S. schenckii</i> | IIa      | 2                | 16       | 0.1699     | 0.1555   | 14.5000     | 0.0053    | 0.0770   | 0.1815    | 3.0000 |
|                            |                     | IIb      | 4                | 30       | 0.3988     | 0.3192   | 21.7500     | 0.0033    | 0.0723   | 0.4761    | 8.5000 |
| IIc                        |                     | 6        | 23               | 0.2778   | 0.2392     | 19.1667  | 0.0020      | 0.0386    | 0.3066   | 4.3333    |        |
| IId                        |                     | 2        | 18               | 0.1975   | 0.1780     | 16.0000  | 0.0055      | 0.0878    | 0.2127   | 4.0000    |        |
| IIe                        |                     | 2        | 28               | 0.1626   | 0.1494     | 25.5000  | 0.0029      | 0.0741    | 0.1721   | 5.0000    |        |
| IIf                        |                     | 2        | 28               | 0.2449   | 0.2149     | 24.0000  | 0.0044      | 0.1050    | 0.2675   | 8.0000    |        |
| IIg                        |                     | 2        | 33               | 0.1896   | 0.1716     | 29.5000  | 0.0029      | 0.0848    | 0.2023   | 7.0000    |        |
| IIh                        |                     | 2        | 15               | 0.2778   | 0.2392     | 12.5000  | 0.0093      | 0.1157    | 0.3103   | 5.0000    |        |
| IIi                        |                     | 2        | 37               | 0.2531   | 0.2211     | 31.5000  | 0.0034      | 0.1077    | 0.2769   | 11.0000   |        |
| IIj                        |                     | 3        | 26               | 0.3550   | 0.2920     | 20.0000  | 0.0046      | 0.0910    | 0.4106   | 7.3333    |        |
| IIk                        |                     | 6        | 33               | 0.3921   | 0.3152     | 24.1667  | 0.0020      | 0.0479    | 0.4647   | 7.6667    |        |
| <i>S. globosa</i>          |                     | IIIa     | 24               | 37       | 0.4610     | 0.3547   | 23.6667     | 0.0005    | 0.0123   | 0.5911    | 5.8333 |
|                            |                     | IIIb     | 2                | 37       | 0.1928     | 0.1742   | 33.0000     | 0.0026    | 0.0860   | 0.2058    | 8.0000 |
|                            | IIIc                | 6        | 29               | 0.4324   | 0.3389     | 19.8333  | 0.0025      | 0.0493    | 0.5335   | 6.3333    |        |

  

| <b>#2 EcoRI-GA/MseI-AG</b> |                 |          |                  |          |            |          |             |           |          |           |
|----------------------------|-----------------|----------|------------------|----------|------------|----------|-------------|-----------|----------|-----------|
| <b>Species</b>             | <b>Subclade</b> | <b>n</b> | <b>Fragments</b> | <b>H</b> | <b>PIC</b> | <b>E</b> | <b>Havp</b> | <b>MI</b> | <b>D</b> | <b>Rp</b> |
| <i>S. brasiliensis</i>     | Ia              | 31       | 38               | 0.4775   | 0.3635     | 23.0323  | 0.0004      | 0.0093    | 0.6328   | 5.9355    |
|                            | Ib              | 2        | 26               | 0.1087   | 0.1028     | 24.5000  | 0.0021      | 0.0512    | 0.1131   | 3.0000    |
|                            | Ic              | 17       | 40               | 0.4657   | 0.3573     | 25.2353  | 0.0007      | 0.0173    | 0.6023   | 11.1765   |
|                            | Id              | 2        | 33               | 0.1653   | 0.1516     | 30.0000  | 0.0025      | 0.0751    | 0.1748   | 6.0000    |
|                            | Ie              | 2        | 25               | 0.1472   | 0.1364     | 23.0000  | 0.0029      | 0.0677    | 0.1551   | 4.0000    |
|                            | If              | 5        | 26               | 0.1922   | 0.1737     | 23.2000  | 0.0015      | 0.0343    | 0.2045   | 2.0000    |
|                            | Ig              | 3        | 29               | 0.3144   | 0.2650     | 23.3333  | 0.0036      | 0.0843    | 0.3545   | 6.6667    |
|                            | Ih              | 4        | 32               | 0.2743   | 0.2367     | 26.7500  | 0.0021      | 0.0573    | 0.3023   | 5.5000    |
| <i>S. schenckii</i>        | IIa             | 3        | 30               | 0.2923   | 0.2496     | 24.6667  | 0.0032      | 0.0801    | 0.3256   | 6.0000    |
|                            | IIb             | 10       | 36               | 0.4407   | 0.3436     | 24.2000  | 0.0012      | 0.0296    | 0.5487   | 7.6000    |
|                            | IIc             | 2        | 28               | 0.1913   | 0.1730     | 25.0000  | 0.0034      | 0.0854    | 0.2045   | 6.0000    |
|                            | IId             | 3        | 15               | 0.2923   | 0.2496     | 12.3333  | 0.0065      | 0.0801    | 0.3273   | 3.3333    |
|                            | IIe             | 2        | 17               | 0.2076   | 0.1861     | 15.0000  | 0.0061      | 0.0916    | 0.2246   | 4.0000    |
|                            | IIf             | 3        | 21               | 0.3457   | 0.2859     | 16.3333  | 0.0055      | 0.0896    | 0.3978   | 6.0000    |
|                            | IIg             | 8        | 39               | 0.3782   | 0.3067     | 29.1250  | 0.0012      | 0.0353    | 0.4429   | 10.2500   |
|                            | IIh             | 2        | 35               | 0.2449   | 0.2149     | 30.0000  | 0.0035      | 0.1050    | 0.2671   | 10.0000   |
| <i>S. globosa</i>          | IIi             | 2        | 24               | 0.2188   | 0.1948     | 21.0000  | 0.0046      | 0.0957    | 0.2367   | 6.0000    |
|                            | IIj             | 4        | 30               | 0.3394   | 0.2818     | 23.5000  | 0.0028      | 0.0665    | 0.3878   | 8.0000    |
|                            | IIIa            | 21       | 34               | 0.4499   | 0.3487     | 22.3810  | 0.0006      | 0.0141    | 0.5670   | 7.9048    |
|                            | IIIb            | 2        | 28               | 0.2449   | 0.2149     | 24.0000  | 0.0044      | 0.1050    | 0.2675   | 8.0000    |
|                            | IIIc            | 2        | 31               | 0.2248   | 0.1995     | 27.0000  | 0.0036      | 0.0979    | 0.2433   | 8.0000    |
|                            | IIId            | 2        | 20               | 0.0950   | 0.0905     | 19.0000  | 0.0024      | 0.0451    | 0.0987   | 2.0000    |
|                            | IIIe            | 2        | 26               | 0.2041   | 0.1833     | 23.0000  | 0.0039      | 0.0903    | 0.2195   | 6.0000    |

| #3 <i>EcoRI</i> -TA/ <i>MseI</i> -AA |                   |      |           |        |        |         |        |        |        |        |
|--------------------------------------|-------------------|------|-----------|--------|--------|---------|--------|--------|--------|--------|
| Species                              | Subclade          | n    | Fragments | H      | PIC    | E       | Havp   | MI     | D      | Rp     |
| <i>S. brasiliensis</i>               | Ia                | 24   | 22        | 0.4896 | 0.3698 | 12.5833 | 0.0009 | 0.0117 | 0.6733 | 1.8333 |
|                                      | Ib                | 3    | 26        | 0.3261 | 0.2729 | 20.6667 | 0.0042 | 0.0864 | 0.3703 | 6.0000 |
|                                      | Ic                | 6    | 18        | 0.3656 | 0.2987 | 13.6667 | 0.0034 | 0.0463 | 0.4252 | 4.0000 |
|                                      | Id                | 3    | 14        | 0.2449 | 0.2149 | 12.0000 | 0.0058 | 0.0700 | 0.2683 | 3.3333 |
|                                      | Ie                | 10   | 18        | 0.2778 | 0.2392 | 15.0000 | 0.0015 | 0.0231 | 0.3063 | 2.0000 |
|                                      | If                | 2    | 21        | 0.2778 | 0.2392 | 17.5000 | 0.0066 | 0.1157 | 0.3089 | 7.0000 |
|                                      | Ig                | 2    | 21        | 0.2098 | 0.1878 | 18.5000 | 0.0050 | 0.0924 | 0.2265 | 5.0000 |
|                                      | Ih                | 3    | 18        | 0.1372 | 0.1278 | 16.6667 | 0.0025 | 0.0423 | 0.1440 | 1.3333 |
|                                      | Ii                | 3    | 15        | 0.0000 | 0.0000 | 15.0000 | 0.0000 | 0.0000 | 0.0000 | 0.0000 |
| <i>S. schenckii</i>                  | IIa               | 3    | 24        | 0.3299 | 0.2755 | 19.0000 | 0.0046 | 0.0870 | 0.3756 | 6.6667 |
|                                      | IIb               | 3    | 24        | 0.2778 | 0.2392 | 20.0000 | 0.0039 | 0.0772 | 0.3075 | 4.6667 |
|                                      | IIc               | 4    | 23        | 0.3639 | 0.2977 | 17.5000 | 0.0040 | 0.0692 | 0.4231 | 5.0000 |
|                                      | IId               | 2    | 19        | 0.2285 | 0.2024 | 16.5000 | 0.0060 | 0.0992 | 0.2489 | 5.0000 |
|                                      | IIe               | 2    | 15        | 0.2778 | 0.2392 | 12.5000 | 0.0093 | 0.1157 | 0.3103 | 5.0000 |
|                                      | IIf               | 2    | 12        | 0.0799 | 0.0767 | 11.5000 | 0.0033 | 0.0383 | 0.0833 | 1.0000 |
|                                      | IIg               | 6    | 22        | 0.4100 | 0.3260 | 15.6667 | 0.0031 | 0.0487 | 0.4944 | 5.3333 |
|                                      | IIh               | 4    | 22        | 0.2355 | 0.2078 | 19.0000 | 0.0027 | 0.0509 | 0.2555 | 4.0000 |
|                                      | <i>S. globosa</i> | IIIa | 12        | 14     | 0.4404 | 0.3434  | 9.4167 | 0.0026 | 0.0247 | 0.5489 |
| IIIb                                 |                   | 5    | 13        | 0.3011 | 0.2557 | 10.6000 | 0.0046 | 0.0491 | 0.3375 | 1.2000 |
| IIIc                                 |                   | 8    | 16        | 0.3671 | 0.2997 | 12.1250 | 0.0029 | 0.0348 | 0.4272 | 3.7500 |
| IIId                                 |                   | 2    | 21        | 0.2098 | 0.1878 | 18.5000 | 0.0050 | 0.0924 | 0.2265 | 5.0000 |

D: discriminating power; E: effective multiplex ratio; H: expected heterozygosity; Havp: mean heterozygosity; MI: marker index; PIC: polymorphism information content; Rp: resolving power.

**Supplementary Table S5.** Analysis of molecular variance (AMOVA) shows the partitioning of genetic variation within and between *Sporothrix brasiliensis* geographic populations.

| Marker         | Source of variation | df | SS      | MS     | Est. var. | %    | P-value |
|----------------|---------------------|----|---------|--------|-----------|------|---------|
| <b>AFLP #3</b> | Among Population    | 2  | 53.151  | 26.575 | 0.896     | 10%  | 0.0001  |
|                | Within Population   | 68 | 523.835 | 7.703  | 7.703     | 90%  | 0.0001  |
|                | Total marker #3     | 70 | 576.986 |        | 8.599     | 100% |         |
| <b>AFLP #5</b> | Among Population    | 2  | 39.180  | 19.590 | 0.572     | 7%   | 0.002   |
|                | Within Population   | 68 | 511.890 | 7.528  | 7.528     | 93%  | 0.002   |
|                | Total marker #5     | 70 | 551.070 |        | 8.100     | 100% |         |
| <b>AFLP #6</b> | Among Population    | 2  | 32.669  | 16.335 | 0.525     | 9%   | 0.0001  |
|                | Within Population   | 68 | 358.852 | 5.277  | 5.277     | 91%  | 0.0001  |
|                | Total marker #6     | 70 | 391.521 |        | 5.802     | 100% |         |

(df = degree of freedom, SS = sum of squares, MS mean squares, Est. var. = estimate of variance, %= percentage of total variation, P-value is based on 9,999 permutations). Geographic Population 1: *S. brasiliensis* isolates from South (n=22); Geographic population 2: *S. brasiliensis* isolates from Southeast (n=38); Geographic population 3: *S. brasiliensis* isolates from Northeast (n=11).

**Supplementary Table S6.** Summary of statistics calculated for mating-type of clinical clade isolates in the three combinations.

| Species                | AFLP combination #3 |            |     |                 |    |         | AFLP combination #5 |            |     |                 |    |         | AFLP combination #6 |            |     |                 |    |          |
|------------------------|---------------------|------------|-----|-----------------|----|---------|---------------------|------------|-----|-----------------|----|---------|---------------------|------------|-----|-----------------|----|----------|
|                        | n                   | MAT-allele |     | $\chi^2$ mating |    |         | n                   | MAT-allele |     | $\chi^2$ mating |    |         | n                   | MAT-allele |     | $\chi^2$ mating |    |          |
|                        |                     | I-1        | I-2 | $\chi^2$        | df | P-value |                     | I-1        | I-2 | $\chi^2$        | df | P-value |                     | I-1        | I-2 | $\chi^2$        | df | P-value  |
| <i>S. brasiliensis</i> | 72                  | 30         | 42  | 2.000           | 1  | 0.1573  | 72                  | 30         | 42  | 2.000           | 1  | 0.1572  | 72                  | 30         | 42  | 2.000           | 1  | 0.157299 |
| Subclade Ia            | 27                  | 0          | 27  | 27.000          | 1  | 0.0001  | 31                  | 3          | 28  | 20.161          | 1  | 0.0001  | 24                  | 1          | 23  | 20.167          | 1  | 0.0001   |
| Subclade Ib            | 2                   | 0          | 2   | 2.000           | 1  | 0.1573  | 2                   | 0          | 2   | 2.000           | 1  | 0.1573  | 3                   | 0          | 3   | 3.000           | 1  | 0.0833   |
| Subclade Ic            | 3                   | 1          | 2   | 0.333           | 1  | 0.5637  | 17                  | 12         | 5   | 2.882           | 1  | 0.0896  | 6                   | 4          | 2   | 0.667           | 1  | 0.4142   |
| Subclade Id            | 8                   | 6          | 2   | 2.000           | 1  | 0.1573  | 2                   | 0          | 2   | 2.000           | 1  | 0.1573  | 3                   | 2          | 1   | 0.333           | 1  | 0.5637   |
| Subclade Ie            | 2                   | 1          | 1   | 0.000           | 1  | 10.000  | 2                   | 2          | 0   | 2.000           | 1  | 0.1573  | 10                  | 7          | 3   | 1.600           | 1  | 0.2059   |
| Subclade If            | 2                   | 1          | 1   | 0.000           | 1  | 10000   | 5                   | 4          | 1   | 1.800           | 1  | 0.1797  | 2                   | 0          | 2   | 2.000           | 1  | 0.1573   |
| Subclade Ig            | 5                   | 5          | 0   | 5.000           | 1  | 0.0253  | 3                   | 2          | 1   | 0.333           | 1  | 0.5637  | 2                   | 2          | 0   | 2.000           | 1  | 0.1573   |
| Subclade Ih            | 5                   | 4          | 1   | 1.800           | 1  | 0.1797  | 4                   | 4          | 0   | 4.000           | 1  | 0.0455  | 3                   | 2          | 1   | 0.333           | 1  | 0.5637   |
| Subclade Ii            | 2                   | 0          | 2   | 2.000           | 1  | 0.1573  | -                   | -          | -   | -               | -  | -       | 3                   | 3          | 0   | 3000            | 1  | 0.0833   |
| Subclade Ij            | 2                   | 2          | 0   | 2.000           | 1  | 0.1573  | -                   | -          | -   | -               | -  | -       | -                   | -          | -   | -               | -  | -        |
| Subclade Ik            | 3                   | 3          | 0   | 3.000           | 1  | 0.0833  | -                   | -          | -   | -               | -  | -       | -                   | -          | -   | -               | -  | -        |
| <i>S. schenckii</i>    | 66                  | 26         | 40  | 2.970           | 1  | 0.0848  | 66                  | 26         | 40  | 2970            | 1  | 0.0848  | 66                  | 26         | 40  | 2970            | 1  | 0.0848   |
| Subclade IIa           | 2                   | 2          | 0   | 2.000           | 1  | 0.1573  | 3                   | 0          | 3   | 3000            | 1  | 0.0833  | 3                   | 1          | 2   | 0.333           | 1  | 0.5637   |
| Subclade IIb           | 4                   | 0          | 4   | 4.000           | 1  | 0.0455  | 10                  | 5          | 5   | 0.000           | 1  | 10000   | 3                   | 1          | 2   | 0.333           | 1  | 0.5637   |
| Subclade IIc           | 6                   | 6          | 0   | 6.000           | 1  | 0.0143  | 2                   | 1          | 1   | 0.000           | 1  | 10000   | 4                   | 4          | 0   | 4000            | 1  | 0.0455   |
| Subclade IId           | 2                   | 1          | 1   | 0.000           | 1  | 10000   | 3                   | 1          | 2   | 0.333           | 1  | 0.5637  | 2                   | 1          | 1   | 0.000           | 1  | 10000    |
| Subclade IIe           | 2                   | 1          | 1   | 0.000           | 1  | 10000   | 2                   | 2          | 0   | 2000            | 1  | 0.1573  | 2                   | 0          | 2   | 2000            | 1  | 0.1573   |
| Subclade IIf           | 2                   | 1          | 1   | 0.000           | 1  | 10000   | 3                   | 2          | 1   | 0.333           | 1  | 0.5637  | 2                   | 0          | 2   | 2000            | 1  | 0.1573   |
| Subclade IIg           | 2                   | 1          | 1   | 0.000           | 1  | 10000   | 8                   | 3          | 5   | -               | -  | -       | 6                   | 2          | 4   | 0.667           | 1  | 0.4142   |
| Subclade IIh           | 2                   | 0          | 2   | 2.000           | 1  | 0.1573  | 2                   | 1          | 1   | 0.000           | 1  | 10000   | 4                   | 4          | 0   | 4000            | 1  | 0.0455   |
| Subclade IIf           | 2                   | 2          | 0   | 2.000           | 1  | 0.1573  | 2                   | 0          | 2   | 2000            | 1  | 0.1573  | -                   | -          | -   | -               | -  | -        |

| Species           | AFLP combination #3 |            |     |                 |    |         | AFLP combination #5 |            |     |                 |    |          | AFLP combination #6 |            |     |                 |    |         |
|-------------------|---------------------|------------|-----|-----------------|----|---------|---------------------|------------|-----|-----------------|----|----------|---------------------|------------|-----|-----------------|----|---------|
|                   | n                   | MAT-allele |     | $\chi^2$ mating |    |         | n                   | MAT-allele |     | $\chi^2$ mating |    |          | n                   | MAT-allele |     | $\chi^2$ mating |    |         |
|                   |                     | I-1        | I-2 | $\chi^2$        | df | P-value |                     | I-1        | I-2 | $\chi^2$        | df | P-value  |                     | I-1        | I-2 | $\chi^2$        | df | P-value |
| Subclade IIj      | 3                   | 2          | 1   | 0.333           | 1  | 0.5637  | 4                   | 1          | 3   | 1000            | 1  | 0.3173   | -                   | -          | -   | -               | -  | -       |
| Subclade IIk      | 6                   | 2          | 4   | 0.667           | 1  | 0.4142  | -                   | -          | -   | -               | -  | -        | -                   | -          | -   | -               | -  | -       |
| <i>S. globosa</i> | 34                  | 26         | 8   | 9.529           | 1  | 0.0020  | 34                  | 26         | 8   | 9529            | 1  | 0.002022 | 34                  | 26         | 8   | 9529            | 1  | 0.0020  |
| Subclade IIIa     | 24                  | 20         | 4   | 10.667          | 1  | 0.0011  | 21                  | 17         | 4   | -               | -  | -        | 12                  | 12         | 0   | 12000           | 1  | 0.0005  |
| Subclade IIIb     | 2                   | 2          | 0   | 2.000           | 1  | 0.1573  | 2                   | 2          | 0   | 2000            | 1  | 0.1573   | 5                   | 1          | 4   | 1800            | 1  | 0.1797  |
| Subclade IIIc     | 6                   | 2          | 4   | 0.667           | 1  | 0.4142  | 2                   | 2          | 0   | 2000            | 1  | 0.1573   | 8                   | 7          | 1   | 4500            | 1  | 0.0339  |
| Subclade IIId     | -                   | -          | -   | -               | -  | -       | 2                   | 0          | 2   | 2000            | 1  | 0.1573   | 2                   | 2          | 0   | 2000            | 1  | 0.1573  |
| Subclade IIIe     | -                   | -          | -   | -               | -  | -       | 2                   | 2          | 0   | 2000            | 1  | 0.1573   | -                   | -          | -   | -               | -  | -       |

N: number of isolates; df: degree of freedom.

**Supplementary Table S7:** Search strategy: Phylogenetic trends in *Sporothrix*

| Search # | Terms                                                          | Period covered | Number of articles |
|----------|----------------------------------------------------------------|----------------|--------------------|
| 1        | <i>Sporothrix</i> AND diagnosis                                | 2007-2021      | 426                |
| 2        | <i>Sporothrix</i> AND molecular diagnosis                      | 2007-2021      | 44                 |
| 3        | Sporotrichosis AND molecular diagnosis                         | 2007-2021      | 52                 |
| 4        | <i>Sporothrix</i> AND PCR                                      | 2007-2021      | 48                 |
| 5        | <i>Sporothrix</i> AND MLSA                                     | 2007-2021      | 0                  |
| 6        | <i>Sporothrix</i> AND barcoding                                | 2007-2021      | 3                  |
| 7        | <i>Sporothrix</i> AND internal transcribed spacer              | 2007-2021      | 23                 |
| 8        | <i>Sporothrix</i> AND restriction fragment length polymorphism | 2007-2021      | 8                  |
| 9        | <i>Sporothrix</i> AND restriction amplified polymorphic DNA    | 2007-2021      | 1                  |
| 10       | <i>Sporothrix</i> AND loop-mediated isothermal amplification   | 2007-2021      | 0                  |
| 11       | <i>Sporothrix</i> AND qPCR                                     | 2007-2021      | 6                  |
| 12       | <i>Sporothrix</i> AND microsatellites                          | 2007-2021      | 1                  |

A search of PubMed was undertaken in June 2021. The search terms used were: (1) *Sporothrix* AND diagnosis; (2) *Sporothrix* AND molecular diagnosis; (3) Sporotrichosis AND molecular diagnosis; (4) *Sporothrix* AND PCR; (5) *Sporothrix* AND MLSA; (6) *Sporothrix* AND barcoding; (7) *Sporothrix* AND internal transcribed spacer; (8) *Sporothrix* AND restriction fragment length polymorphism; (9) *Sporothrix* AND restriction amplified polymorphic DNA; (10) *Sporothrix* AND loop-mediated isothermal amplification; (11) *Sporothrix* AND qPCR; (12) *Sporothrix* AND microsatellites, and 426-44-52-48-0-3-23-8-1-0-6-1 results were returned, respectively. These articles were manually filtered to recover studies that describe the occurrence of medically relevant *Sporothrix* species (i.e., *S. brasiliensis*, *S. schenckii*, *S. globosa*, *S. luriei*, *S. mexicana*, *S. chilensis*, *S. pallida*, *S. stenoceras*) using molecular assays (e.g., DNA sequencing, DNA fingerprint, PCR, qPCR, etc.) to be included in the epidemiological trends of sporotrichosis. Due to the low frequency of species embedded in the environmental clade as agents of human and animal sporotrichosis, cases due to *S. mexicana*, *S. chilensis*, *S. pallida*, and *S. stenoceras* were counted as “Environmental clade.” Isolates that appeared in multiple studies were computed a single time in our analysis.

The studies included in our analysis are listed below:

Arenas, R, Miller, D, and Campos-Macias, P. 2007. Epidemiological data and molecular characterization (mtDNA) of *Sporothrix schenckii* in 13 cases from Mexico. *Int J Dermatol* **46**: 177-179.

Boechat, JS, Oliveira, MME, Almeida-Paes, R, Gremião, IDF, Machado, ACS, Oliveira, RVC, Figueiredo, ABF, Rabello, VBS, Silva, KBL, Zancopé-Oliveira, RM, et al. 2018. Feline sporotrichosis: associations between clinical-epidemiological profiles and phenotypic-

- genotypic characteristics of the etiological agents in the Rio de Janeiro epizootic area. *Mem Inst Oswaldo Cruz* **113**: 185-196.
- Borba-Santos, LP, Rodrigues, AM, Gagini, TB, Fernandes, GF, Castro, R, de Camargo, ZP, Nucci, M, Lopes-Bezerra, LM, Ishida, K, and Rozental, S. 2015. Susceptibility of *Sporothrix brasiliensis* isolates to amphotericin B, azoles, and terbinafine. *Med Mycol* **53**: 178-188.
- Camacho, E, León-Navarro, I, Rodríguez-Brito, S, Mendoza, M, and Niño-Vega, GA. 2015. Molecular epidemiology of human sporotrichosis in Venezuela reveals high frequency of *Sporothrix globosa*. *BMC Infect Dis* **15**: 94.
- Córdoba, S, Isla, G, Szusz, W, Vivot, W, Hevia, A, Davel, G, and Canteros, CE. 2018. Molecular identification and susceptibility profile of *Sporothrix schenckii sensu lato* isolated in Argentina. *Mycoses* **61**: 441-448.
- Criseo, G, Malara, G, Romeo, O, and Puglisi Guerra, A. 2008. LF sporotrichosis in an immunocompetent patient: a case report from extreme southern Italy. *Mycopathologia* **166**: 159-162.
- Criseo, G, and Romeo, O. 2010. Ribosomal DNA sequencing and phylogenetic analysis of environmental *Sporothrix schenckii* Strains: comparison with clinical isolates. *Mycopathologia* **169**: 351-358.
- da Cruz Bahiense Rocha, I, Terra, PPD, Cardoso de Oliveira, R, Lubianca Zanotti, R, Falqueto, A, de Camargo, ZP, and Rodrigues, AM. 2021. Molecular-based assessment of diversity and population structure of *Sporothrix* spp. clinical isolates from Espírito Santo-Brazil. **64**: 420-427.
- de Araujo, ML, and Rodrigues, AM. 2015. Human sporotrichosis beyond the epidemic front reveals classical transmission types in Espírito Santo, Brazil. **58**: 485-490.
- de Beer, ZW, Duong, TA, and Wingfield, MJ. 2016. The divorce of *Sporothrix* and *Ophiostoma*: solution to a problematic relationship. *Stud Mycol* **83**: 165-191.
- de Carvalho, JA, Hagen, F, Fisher, MC, de Camargo, ZP, and Rodrigues, AM. 2020. Genome-wide mapping using new AFLP markers to explore intraspecific variation among pathogenic *Sporothrix* species. **14**: e0008330.
- de Meyer, EM, de Beer, ZW, Summerbell, RC, Moharram, AM, de Hoog, GS, Vismer, HF, and Wingfield, MJ. 2008. Taxonomy and phylogeny of new wood- and soil-inhabiting *Sporothrix* species in the *Ophiostoma stenoceras-Sporothrix schenckii* complex. *Mycologia* **100**: 647-661.
- de Oliveira, MM, de Almeida-Paes, R, de Medeiros Muniz, M, de Lima Barros, MB, Galhardo, MC, and Zancoppe-Oliveira, RM. 2010. Sporotrichosis caused by *Sporothrix globosa* in Rio De Janeiro, Brazil: case report. *Mycopathologia* **169**: 359-363.



- de Oliveira, MM, Sampaio, P, Almeida-Paes, R, Pais, C, Gutierrez-Galhardo, MC, and Zancope-Oliveira, RM. 2012. Rapid identification of *Sporothrix* species by T3B fingerprinting. *J Clin Microbiol* **50**: 2159-2162.
- Dias, NM, Oliveira, MM, Santos, C, Zancope-Oliveira, RM, and Lima, N. 2011. Sporotrichosis caused by *Sporothrix mexicana*, Portugal. *Emerg Infect Dis* **17**: 1975-1976.
- do Monte Alves, M, Pipolo Milan, E, da Silva-Rocha, WP, Soares de Sena da Costa, A, and Araújo Maciel, B. 2020. Fatal pulmonary sporotrichosis caused by *Sporothrix brasiliensis* in Northeast Brazil. **14**: e0008141.
- Duangkaew, L, Yurayart, C, Limsivilai, O, Chen, C, and Kasorndorkbua, C. 2019. Cutaneous sporotrichosis in a stray cat from Thailand. *Med Mycol Case Rep* **23**: 46-49.
- Estrada-Barcenas, DA, Vite-Garin, T, Navarro-Barranco, H, de la Torre-Arciniega, R, Perez-Mejia, A, Rodriguez-Arellanes, G, Ramirez, JA, Humberto Sahaza, J, Taylor, ML, and Toriello, C. 2014. Genetic diversity of *Histoplasma* and *Sporothrix* complexes based on sequences of their ITS1-5.8S-ITS2 regions from the BOLD System. *Rev Iberoam Micol* **31**: 90-94.
- Etchecopaz, AN, Lanza, N, Toscanini, MA, Devoto, TB, Pola, SJ, Daneri, GL, Iovannitti, CA, and Cuestas, ML. 2019. Sporotrichosis caused by *Sporothrix brasiliensis* in Argentina: Case report, molecular identification and in vitro susceptibility pattern to antifungal drugs. *J Mycol Med*: 100908.
- Fernandes, B, Caligiorne, RB, Coutinho, DM, Gomes, RR, Rocha-Silva, F, Machado, AS, Santrer, EFR, Assunção, CB, Guimarães, CF, Laborne, MS, et al. 2018. A case of disseminated sporotrichosis caused by *Sporothrix brasiliensis*. *Med Mycol Case Rep* **21**: 34-36.
- Florez-Munoz, SV, Alzate, JF, and Mesa-Arango, AC. 2018. Molecular identification and antifungal susceptibility of clinical isolates of *Sporothrix schenckii* complex in Medellin, Colombia. *Mycopathologia*: 1-11.
- Fujii, H, Tanioka, M, Yonezawa, M, Arakawa, A, Matsumura, Y, Kore-eda, S, Miyachi, Y, Tanaka, S, and Mochizuki, T. 2008. A case of atypical sporotrichosis with multifocal cutaneous ulcers. *Clin Exp Dermatol* **33**: 135-138.
- Galhardo, MC, De Oliveira, RM, Valle, AC, Paes Rde, A, Silvatavares, PM, Monzon, A, Mellado, E, Rodriguez-Tudela, JL, and Cuenca-Estrella, M. 2008. Molecular epidemiology and antifungal susceptibility patterns of *Sporothrix schenckii* isolates from a cat-transmitted epidemic of sporotrichosis in Rio de Janeiro, Brazil. *Med Mycol* **46**: 141-151.
- García Duarte, JM, Wattiez Acosta, VR, Fornerón Viera, PML, Aldama Caballero, A, Gorostiaga Matiauda, GA, Rivelli de Oddone, VB, and Pereira Brunelli, JG. 2017. Esporotricosis transmitida por gato doméstico. Reporte de un caso familiar. *Revista del Nacional (Itauguá)* **9**: 67-76.

- Gong, J, Zhang, M, Wang, Y, Li, R, He, L, Wan, Z, Li, F, and Zhang, J. 2019. Population structure and genetic diversity of *Sporothrix globosa* in China according to 10 novel microsatellite loci. *J Med Microbiol* **68**: 248-254.
- Gonsales, FF, Fernandes, NCCA, Mansho, W, Montenegro, H, and Benites, NR. 2020. Direct PCR of lesions suggestive of sporotrichosis in felines. *Arquivo de Brasileiro de Medicina Veterinária e Zootecnia* **72**: 2002-2006.
- Govender, NP, Maphanga, TG, Zulu, TG, Patel, J, Walaza, S, Jacobs, C, Ebonwu, JI, Ntuli, S, Naicker, SD, and Thomas, J. 2015. An outbreak of LF sporotrichosis among mine-workers in South Africa. *PLoS Negl Trop Dis* **9**: e0004096.
- Kamal Azam, NK, Selvarajah, GT, Santhanam, J, Abdul Razak, MF, Ginsapu, SJ, James, JE, and Suetrong, S. 2020. Molecular epidemiology of *Sporothrix schenckii* isolates in Malaysia. *Med Mycol* **58**: 617-625.
- Kano, R, Okubo, M, Siew, HH, Kamata, H, and Hasegawa, A. 2015. Molecular typing of *Sporothrix schenckii* isolates from cats in Malaysia. *Mycoses* **58**: 220-224.
- Li, J, Zhan, P, Jiang, Q, Gao, Y, Jin, Y, Zhang, L, Luo, Y, Fan, X, Sun, J, and de Hoog, S. 2019. Prevalence and antifungal susceptibility of *Sporothrix* species in Jiangxi, central China. *Med Mycol* **57**: 954-961.
- Liu, TT, Zhang, K, and Zhou, X. 2014. Molecular identification of *Sporothrix* clinical isolates in China. *J Zhejiang Univ Sci B* **15**: 100-108.
- Macêdo-Sales, PA, Souto, S, Destefani, CA, Lucena, RP, Machado, RLD, Pinto, MR, Rodrigues, AM, Lopes-Bezerra, LM, Rocha, EMS, and Baptista, ARS. 2018. Domestic feline contribution in the transmission of *Sporothrix* in Rio de Janeiro State, Brazil: a comparison between infected and non-infected populations. *BMC Vet Res* **14**: 19.
- Mahmoudi, S, Zaini, F, Kordbacheh, P, Safara, M, and Heidari, M. 2016. *Sporothrix schenckii* complex in Iran: Molecular identification and antifungal susceptibility. *Med Mycol* **54**: 593-599.
- Marimon, R, Cano, J, Gené, J, Sutton, DA, Kawasaki, M, and Guarro, J. 2007. *Sporothrix brasiliensis*, *S. globosa*, and *S. mexicana*, three new *Sporothrix* species of clinical interest. *J Clin Microbiol* **45**: 3198-3206.
- Marimon, R, Gené, J, Cano, J, and Guarro, J. 2008. *Sporothrix luriei*: a rare fungus from clinical origin. *Med Mycol* **46**: 621-625.
- Maschio-Lima, T, Marques, MDR, Lemes, TH, Brizzotti-Mazuchi, NS, Caetano, MH, de Almeida, BG, Bianco, LM, Monteiro, RC, Rodrigues, AM, de Camargo, ZP, et al. 2021. Clinical and epidemiological aspects of feline sporotrichosis caused by *Sporothrix brasiliensis* and in vitro antifungal susceptibility.
- Monno, R, Brindicci, G, Romeo, O, De Carolis, E, Criseo, G, Sanguinetti, M, Fumarola, L, Ingravallo, G, Mariani, M, and Monno, L. 2020. Infection caused by *Sporothrix*

- schenckii*: an autochthonous case in Bari, Southern Italy. *European Journal of Clinical Microbiology & Infectious Diseases* **39**: 2457-2460.
- Montenegro, H, Rodrigues, AM, Dias, MA, da Silva, EA, Bernardi, F, and de Camargo, ZP. 2014. Feline sporotrichosis due to *Sporothrix brasiliensis*: an emerging animal infection in São Paulo, Brazil. *BMC Vet Res* **10**: 269.
- Moussa, TAA, Kadasa, NMS, Al Zahrani, HS, Ahmed, SA, Feng, P, Gerrits van den Ende, AHG, Zhang, Y, Kano, R, Li, F, Li, S, et al. 2017. Origin and distribution of *Sporothrix globosa* causing sapronoses in Asia. *J Med Microbiol* **66**: 560-569.
- Nath, R, Lahon, P, and Timung, L. 2017. Molecular identification and phenotypic characterisation of *Sporothrix globosa* from clinical cases of Eastern Assam, North-east India. *Indian J Med Microbiol* **35**: 269-273.
- New, D, Beukers, AG, Kidd, SE, Merritt, AJ, Weeks, K, van Hal, SJ, and Arthur, I. 2018. Identification of multiple species and subpopulations among Australian clinical *Sporothrix* isolates using whole genome sequencing. *Med Mycol*.
- Oliveira, MM, Almeida-Paes, R, Muniz, MM, Gutierrez-Galhardo, MC, and Zancope-Oliveira, RM. 2011. Phenotypic and molecular identification of *Sporothrix* isolates from an epidemic area of sporotrichosis in Brazil. *Mycopathologia* **172**: 257-267.
- Oliveira, MM, Franco-Duarte, R, Romeo, O, Pais, C, Criseo, G, Sampaio, P, and Zancope-Oliveira, RM. 2015. Evaluation of T3B fingerprinting for identification of clinical and environmental *Sporothrix* species. *FEMS Microbiol Lett* **362**.
- Oliveira, MM, Maifrede, SB, Ribeiro, MA, and Zancope-Oliveira, RM. 2013. Molecular identification of *Sporothrix* species involved in the first familial outbreak of sporotrichosis in the state of Espírito Santo, Southeastern Brazil. *Mem Inst Oswaldo Cruz* **108**: 936-938.
- Oliveira, MME, Almeida-Paes, R, Corrêa-Moreira, D, Borba, CM, Menezes, RC, Freitas, DFS, do Valle, ACF, Schubach, AO, Barros, MBL, Nosanchuk, JD, et al. 2019. A case of sporotrichosis caused by different *Sporothrix brasiliensis* strains: mycological, molecular, and virulence analyses. *Mem Inst Oswaldo Cruz* **114**: e190260.
- Ottonelli Stopiglia, CD, Magagnin, CM, Castrillon, MR, Mendes, SD, Heidrich, D, Valente, P, and Scroferneker, ML. 2014. Antifungal susceptibilities and identification of species of the *Sporothrix schenckii* complex isolated in Brazil. *Med Mycol* **52**: 56-64.
- Ramírez-Soto, MC, Aguilar-Ancori, EG, Quispe-Ricalde, MA, Muñiz-Duran, JG, Quispe-Florez, MM, and Chinen, A. 2021. Molecular identification of *Sporothrix* species in a hyperendemic area in Peru. *J Infect Public Health* **14**: 670-673.
- Rasamoelina, T, Maubon, D, Raharolahy, O, Razanakoto, H, Rakotozandrindrainy, N, Rakotomalala, FA, Bailly, S, Sendrasoa, F, Ranaivo, I, Andrianarison, M, et al. 2019.

- Sporotrichosis in the Highlands of Madagascar, 2013-2017(1). *Emerg Infect Dis* **25**: 1893-1902.
- Reis, RS, Almeida-Paes, R, Muniz Mde, M, Tavares, PM, Monteiro, PC, Schubach, TM, Gutierrez-Galhardo, MC, and Zancopé-Oliveira, RM. 2009. Molecular characterisation of *Sporothrix schenckii* isolates from humans and cats involved in the sporotrichosis epidemic in Rio de Janeiro, Brazil. *Mem Inst Oswaldo Cruz* **104**: 769-774.
- Rodrigues, AM, de Hoog, GS, and de Camargo, ZP. 2014a. Genotyping species of the *Sporothrix schenckii* complex by PCR-RFLP of calmodulin. *Diagn Microbiol Infect Dis* **78**: 383-387.
- Rodrigues, AM, de Hoog, GS, and de Camargo, ZP. 2015. Molecular diagnosis of pathogenic *Sporothrix* species. *PLoS Negl Trop Dis* **9**: e0004190.
- Rodrigues, AM, de Hoog, GS, de Cássia Pires, D, Brihante, RS, Sidrim, JJ, Gadelha, MF, Colombo, AL, and de Camargo, ZP. 2014b. Genetic diversity and antifungal susceptibility profiles in causative agents of sporotrichosis. *BMC Infect Dis* **14**: 219.
- Rodrigues, AM, de Hoog, S, and de Camargo, ZP. 2013a. Emergence of pathogenicity in the *Sporothrix schenckii* complex. *Med Mycol* **51**: 405-412.
- Rodrigues, AM, de Melo Teixeira, M, de Hoog, GS, Schubach, TM, Pereira, SA, Fernandes, GF, Bezerra, LM, Felipe, MS, and de Camargo, ZP. 2013b. Phylogenetic analysis reveals a high prevalence of *Sporothrix brasiliensis* in feline sporotrichosis outbreaks. *PLoS Negl Trop Dis* **7**: e2281.
- Romeo, O, Scordino, F, and Criseo, G. 2011. New insight into molecular phylogeny and epidemiology of *Sporothrix schenckii* species complex based on calmodulin-encoding gene analysis of Italian isolates. *Mycopathologia* **172**: 179-186.
- Rudramurthy, SM, Shankarnarayan, SA, Hemashetter, BM, Verma, S, Chauhan, S, Nath, R, Savio, J, Capoor, M, Kaur, H, Ghosh, AK, et al. 2021. Phenotypic and molecular characterisation of *Sporothrix globosa* of diverse origin from India. **52**: 91-100.
- Sanchotene, KO, Madrid, IM, Klafke, GB, Bergamashi, M, Della Terra, PP, and Rodrigues, AM. 2015. *Sporothrix brasiliensis* outbreaks and the rapid emergence of feline sporotrichosis. **58**: 652-658.
- Sasaki, AA, Fernandes, GF, Rodrigues, AM, Lima, FM, Marini, MM, Dos, SFL, de Melo Teixeira, M, Felipe, MS, da Silveira, JF, and de Camargo, ZP. 2014. Chromosomal polymorphism in the *Sporothrix schenckii* complex. *PLoS ONE* **9**: e86819.
- Silva-Vergara, ML, de Camargo, ZP, Silva, PF, Abdalla, MR, Sgarbieri, RN, Rodrigues, AM, dos Santos, KC, Barata, CH, and Ferreira-Paim, K. 2012. Disseminated *Sporothrix brasiliensis* infection with endocardial and ocular involvement in an HIV-infected patient. *Am J Trop Med Hyg* **86**: 477-480.

- Thomson, J, Trott, DJ, Malik, R, Galgut, B, McAllister, MM, Nimmo, J, Renton, D, and Kidd, SE. 2019. An atypical cause of sporotrichosis in a cat. *Med Mycol Case Rep* **23**: 72-76.
- Valeriano, CAT, and Lima-Neto, RG. 2020. Is *Sporothrix chilensis* circulating outside Chile? **14**: e0008151.
- Zhang, M, and Li, F. 2019. Fast diagnosis of sporotrichosis caused by *Sporothrix globosa*, *Sporothrix schenckii*, and *Sporothrix brasiliensis* based on multiplex real-time PCR. **13**: e0007219.
- Zhang, Y, Hagen, F, Stielow, B, Rodrigues, AM, Samerpitak, K, Zhou, X, Feng, P, Yang, L, Chen, M, Deng, S, et al. 2015. Phylogeography and evolutionary patterns in *Sporothrix* spanning more than 14 000 human and animal case reports. *Persoonia* **35**: 1-20.
- Zhang, Y, Hagen, F, Wan, Z, Liu, Y, Liu, Y, Wang, Q, de Hoog, GS, Li, R, and Zhang, J. 2016. Two cases of sporotrichosis of the right upper extremity in right-handed patients with diabetes mellitus. *Rev Iberoam Micol* **33**: 38-42.
- Zhao, L, Cui, Y, Zhen, Y, Yao, L, Shi, Y, Song, Y, Chen, R, and Li, S. 2017. Genetic variation of *Sporothrix globosa* isolates from diverse geographic and clinical origins in China. *Emerg Microbes Infect* **6**: e88.

**Supplementary Table S8:** Simpson's diversity index and Shannon-Wiener diversity index of the Brazilian regions.

| <b>Brazilian Region</b> | <b>Simpson's diversity index</b> |                  | <b>Shannon-Wiener diversity index</b> |                  |
|-------------------------|----------------------------------|------------------|---------------------------------------|------------------|
|                         | <b>2007-2014</b>                 | <b>2015-2021</b> | <b>2007-2014</b>                      | <b>2015-2021</b> |
| South                   | 0.4613                           | 0.7896           | 1.2300                                | 0.5928           |
| Southeast               | 0.5936                           | 0.8042           | 0.9386                                | 0.5507           |
| Central west            | 0.4000                           | 0.3333           | 1.2520                                | 1.0000           |
| Northeast               | 0.3896                           | 0.3896           | 1.3950                                | 1.3950           |
| North                   | 0.4613                           | 0.7896           | 1.2300                                | 0.5928           |

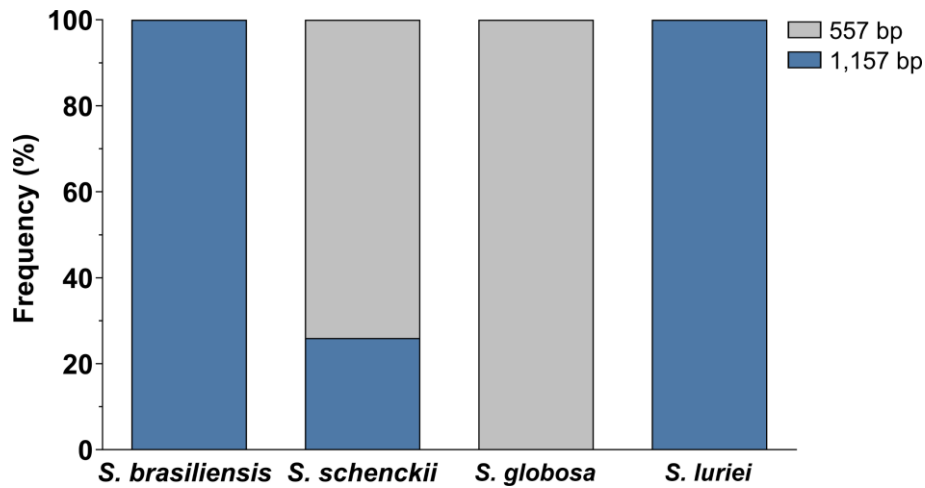

**Supplementary Figure S1.** Mitochondrial genotyping of *Sporothrix* spp. isolates revealed polymorphic amplicons, representing the variability of the intergenic region between *COX2* and *ATP9* in the mitochondrial genome of different isolates. The distribution of polymorphic amplicons (557 or 1,157) is represented according to the phylogenetic species.

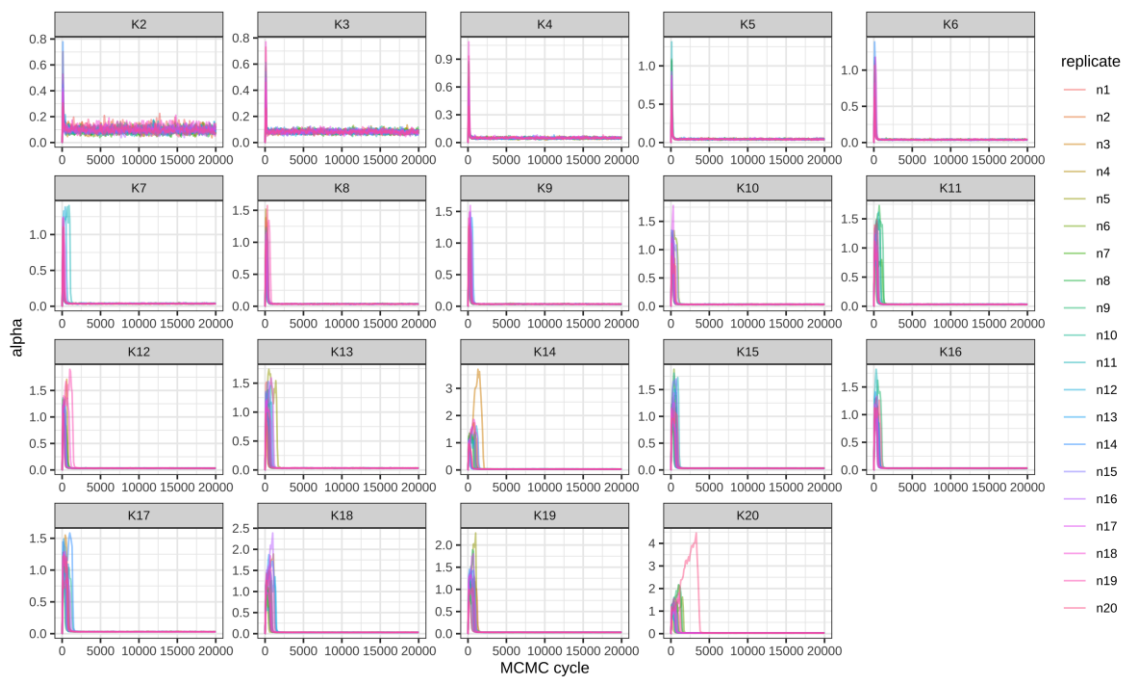

**Supplementary Figure S2:** Alpha values for 20 independent STRUCTURE MCMC chains at k values 1-20 show convergence for all k values apart from k=1 using combination #3 EcoRI-GA/MseI-TT.

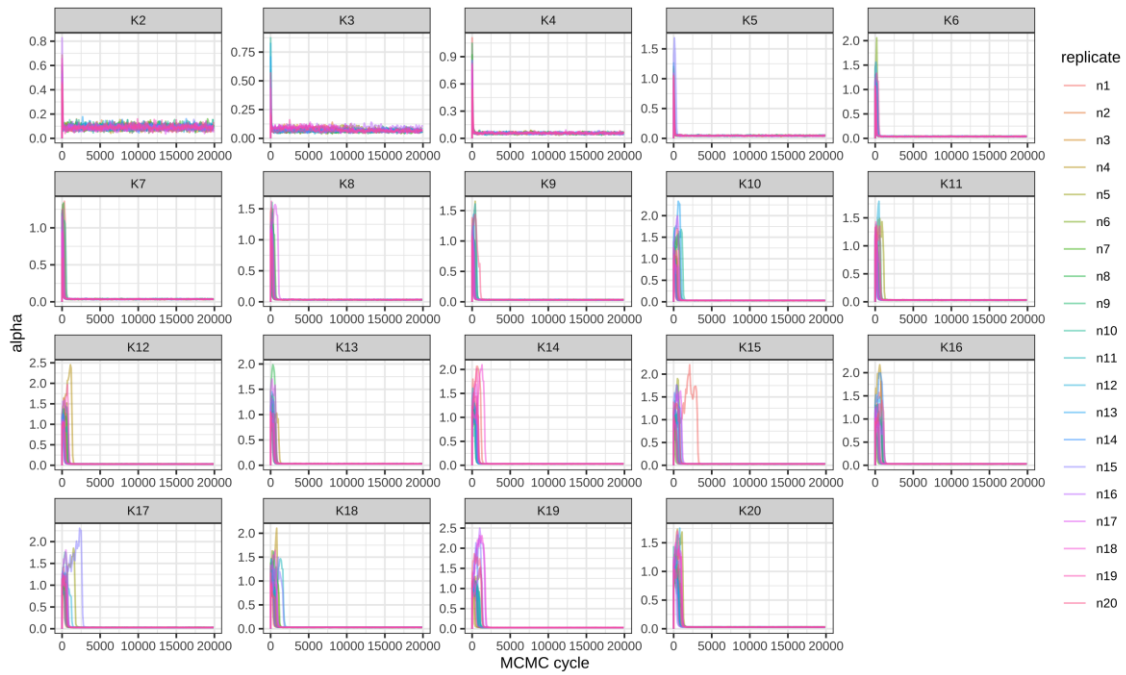

**Supplementary Figure S3:** Alpha values for 20 independent STRUCTURE MCMC chains at k values 1-20 show convergence for all k values apart from k=1 using combination #5 EcoRI-GA/MseI-AG.

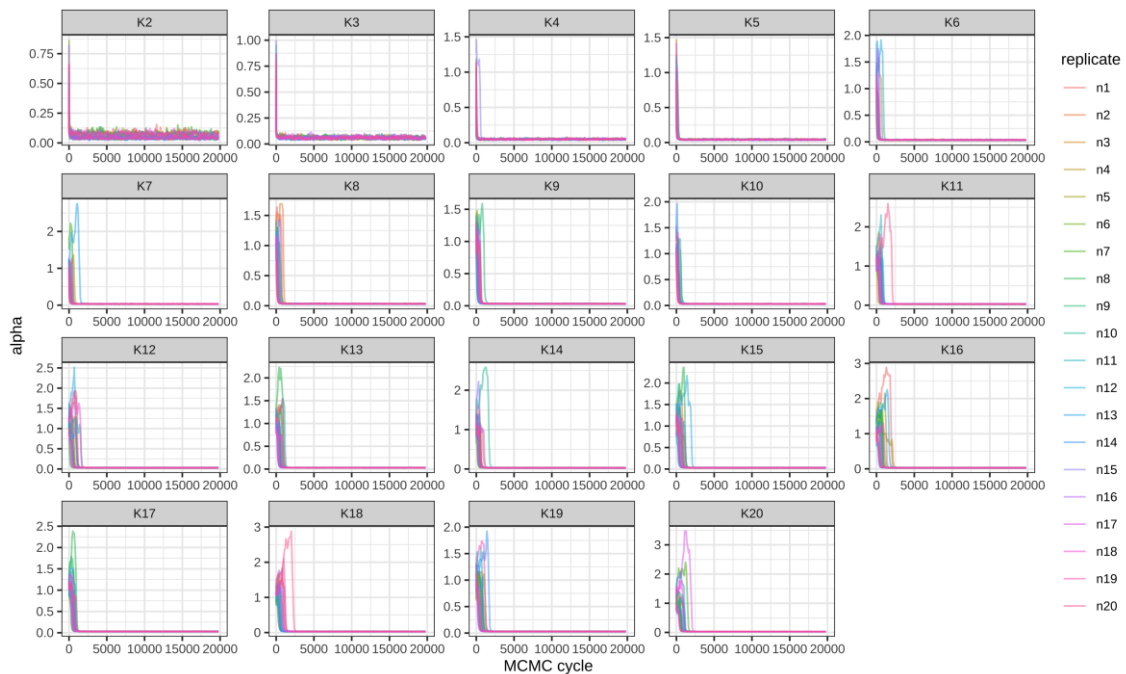

**Supplementary Figure S4:** Alpha values for 20 independent STRUCTURE MCMC chains at k values 1-20 show convergence for all k values apart from k=1 using combination #6 EcoRI-TA/MseI-AA.



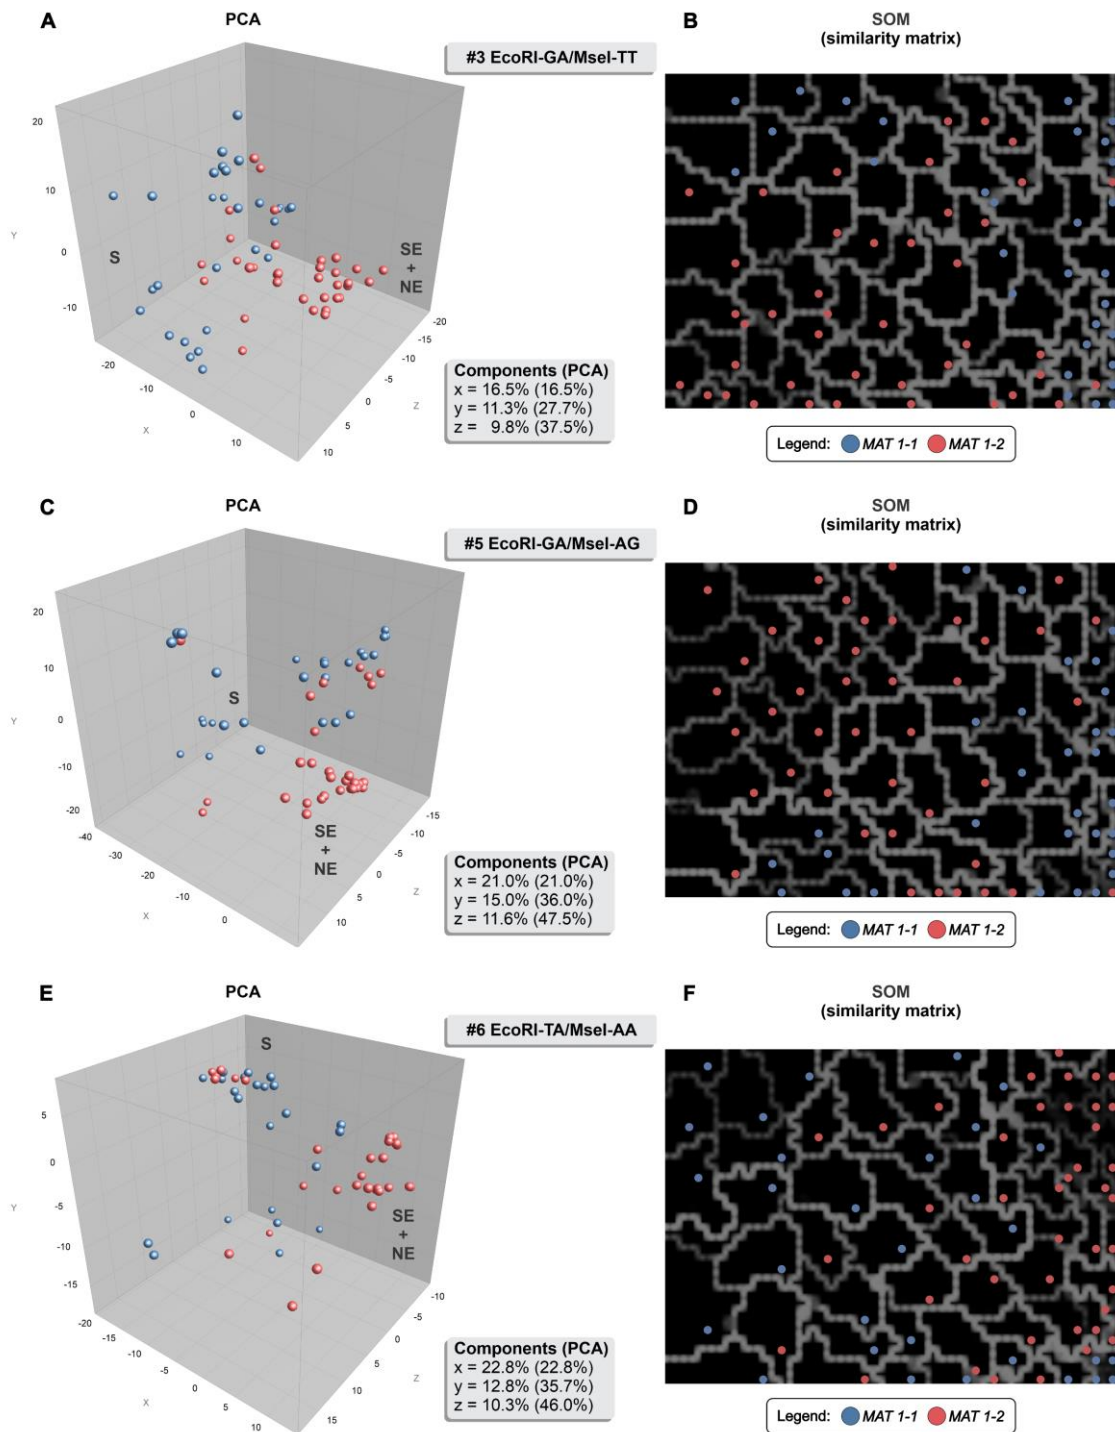

**Supplementary Figure S5:** Principal component analysis (PCA) and self-organizing mapping (SOM) analysis for *S. brasiliensis* isolates using the combinations #3 FAM-EcoRI-GA/MseI-TT (A and B), #5 FAM-EcoRI-GA/MseI-AG (C and D), and #6 FAM-EcoRI-TA/MseI-AA (E and F) plotted according to the mating-type groups. PCAs and SOMs were created in the software BioNumerics v.7.6. S: *S. brasiliensis* South isolates (n=22); SE: *S. brasiliensis* Southeast isolates (n=38); NE: *S. brasiliensis* Northeast isolates (n=11).

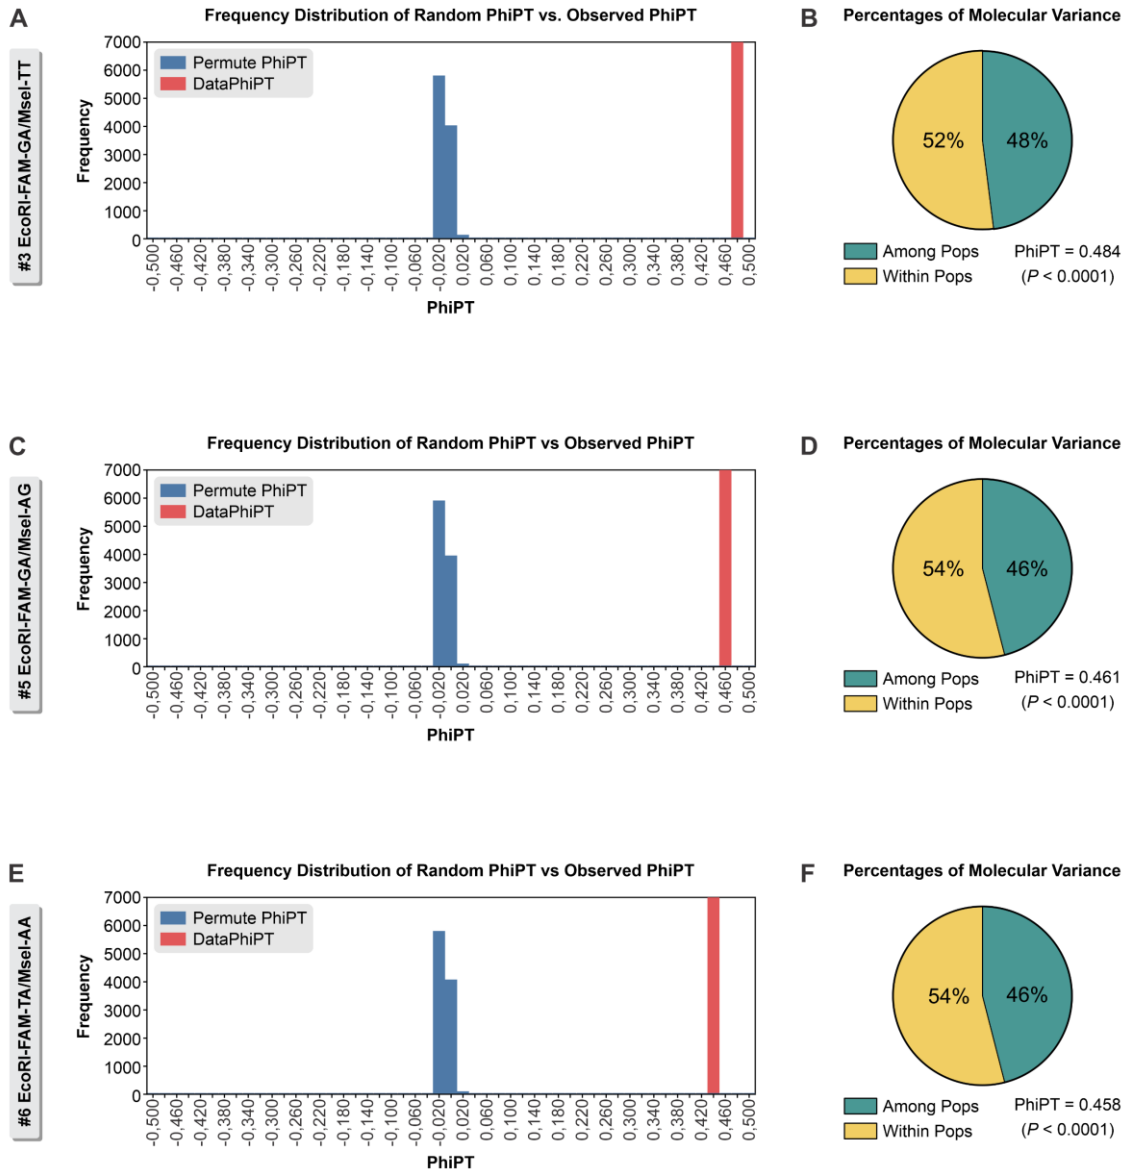

**Supplementary Figure S6:** PhiPT genetic distances among the studied populations for AFLP markers #3 EcoRI-GA/MseI-TT, #5 EcoRI-GA/MseI-AG, and #6 EcoRI-TA/MseI-AA. **A**, **C**, and **E**: Frequency Distribution of Random PhiPT vs. Observed PhiPT. **B**, **D**, and **F**: Percentages of molecular variance.

*Sporothrix brasiliensis*

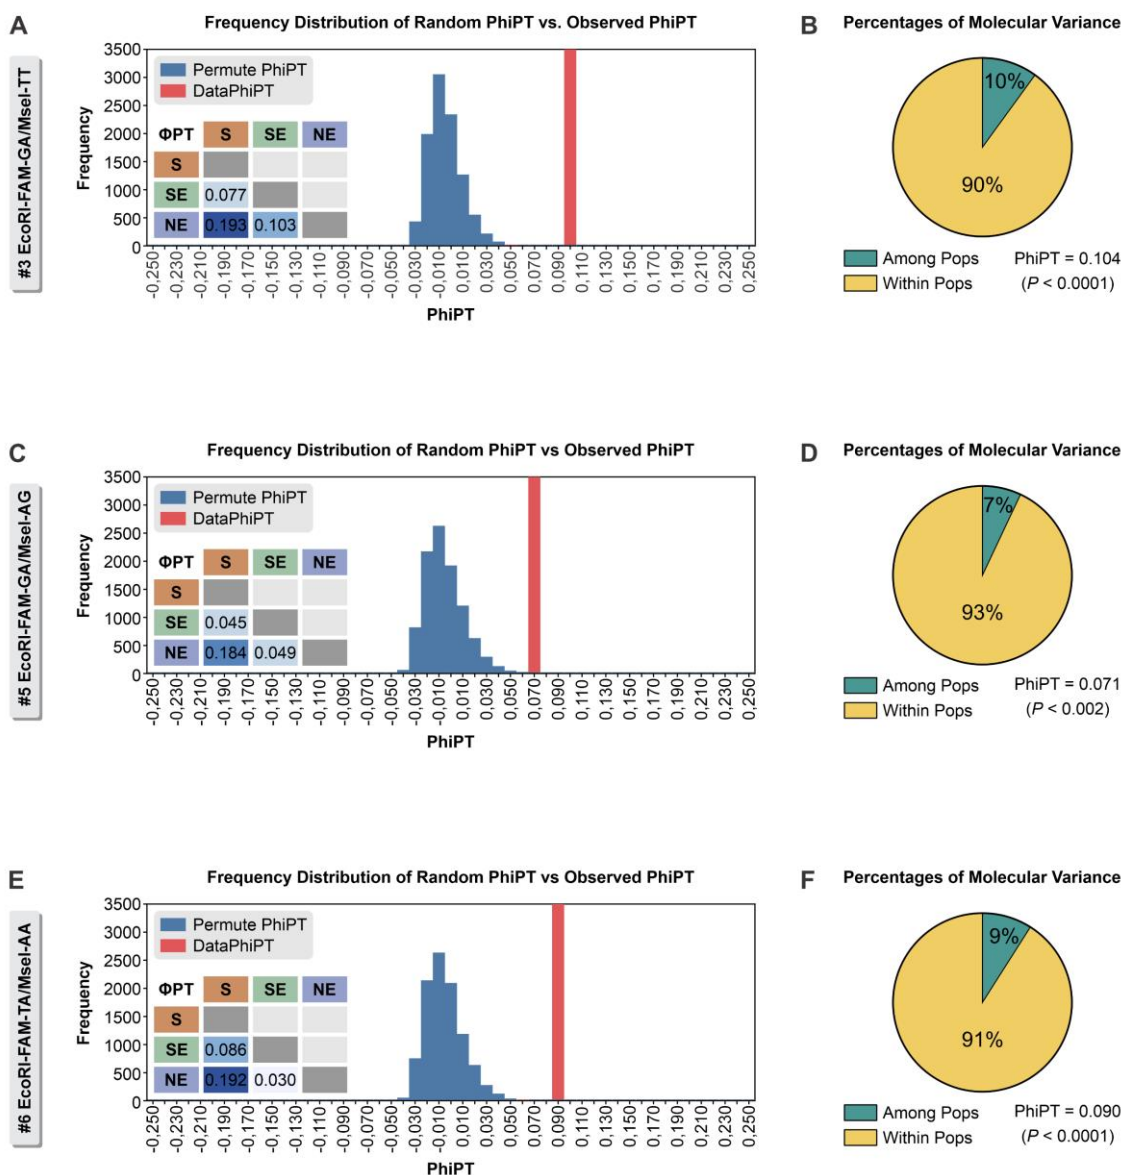

**Supplementary Figure S7:** PhiPT genetic distances among *S. brasiliensis* geographic populations for AFLP markers #3 EcoRI-GA/MseI-TT, #5 EcoRI-GA/MseI-AG, and #6 EcoRI-TA/MseI-AA. **A**, **C** and **E**: Frequency Distribution of Random PhiPT vs. Observed PhiPT. **B**, **D**, and **F**: Percentages of molecular variance. The most significant PhiPT values were found between the South (S) and Northeast (NE) isolates (PhiPT = 0.184–0.193). The lowest values were found in pairwise comparisons between the Southeast and Northeast, demonstrating the proximity of these isolates (PhiPT = 0.030–0.103). S: *S. brasiliensis* South isolates (n=22); SE: *S. brasiliensis* Southeast isolates (n=38); NE: *S. brasiliensis* Northeast isolates (n=11).

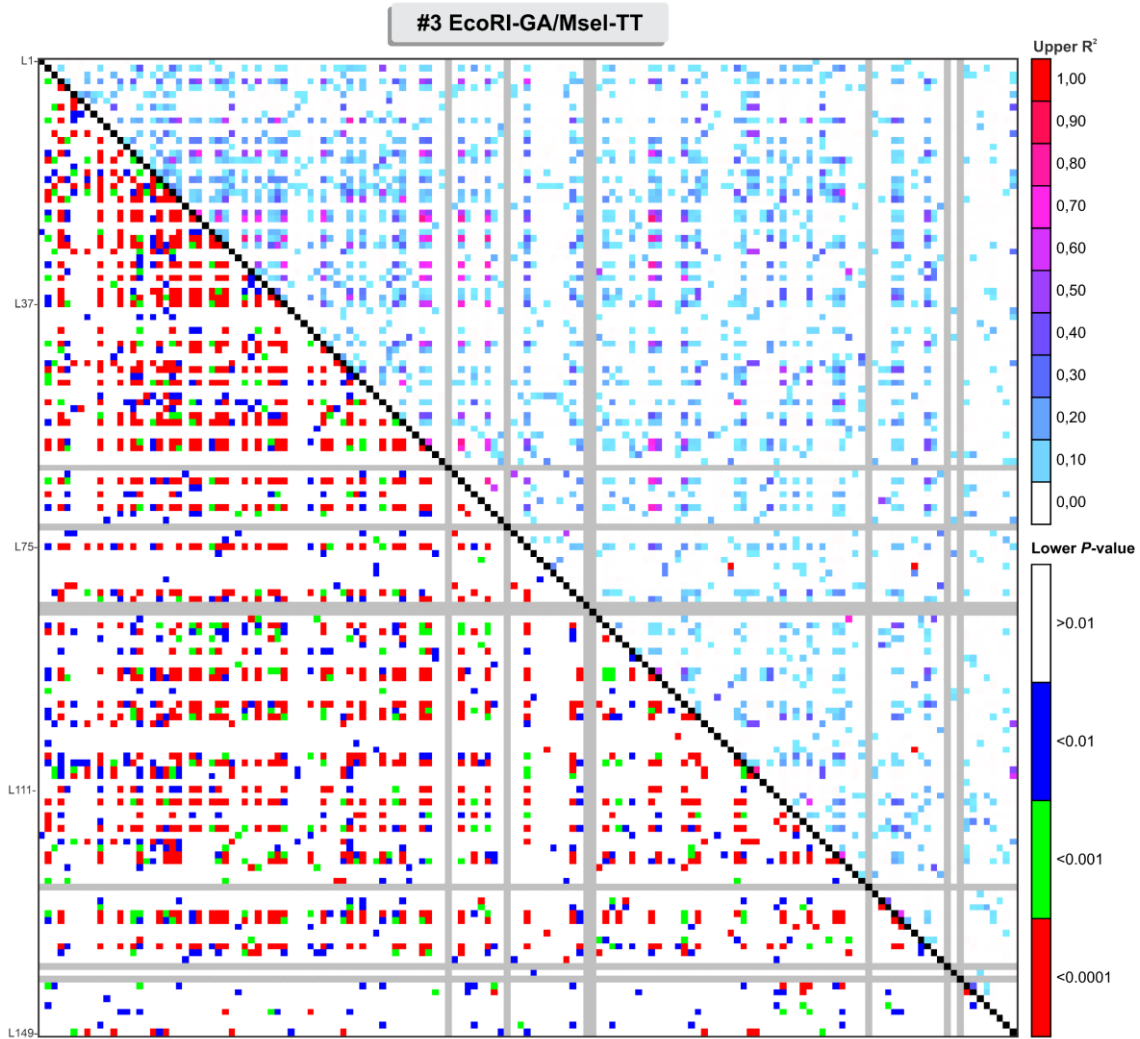

**Supplementary Figure S8.** Disequilibrium matrix for 149 polymorphic AFLP loci based on medically relevant *Sporothrix* species (*S. brasiliensis*, n=72; *S. schenckii*, n=67; *S. globosa*, n=34). Pairwise calculations (11,026 pairs) of linkage disequilibrium (LD) ( $r^2$ ) are displayed above the diagonal, with the corresponding  $P$ -values for Fisher's exact test displayed below the diagonal. The colour legends indicate the level of significance ( $P$ -value) and the corresponding strength of LD ( $r^2$ ). The locus position (L) is indicated on the left X-axis. Mean  $r^2 = 0.0379$ . Mean  $D' = 0.6729$ .

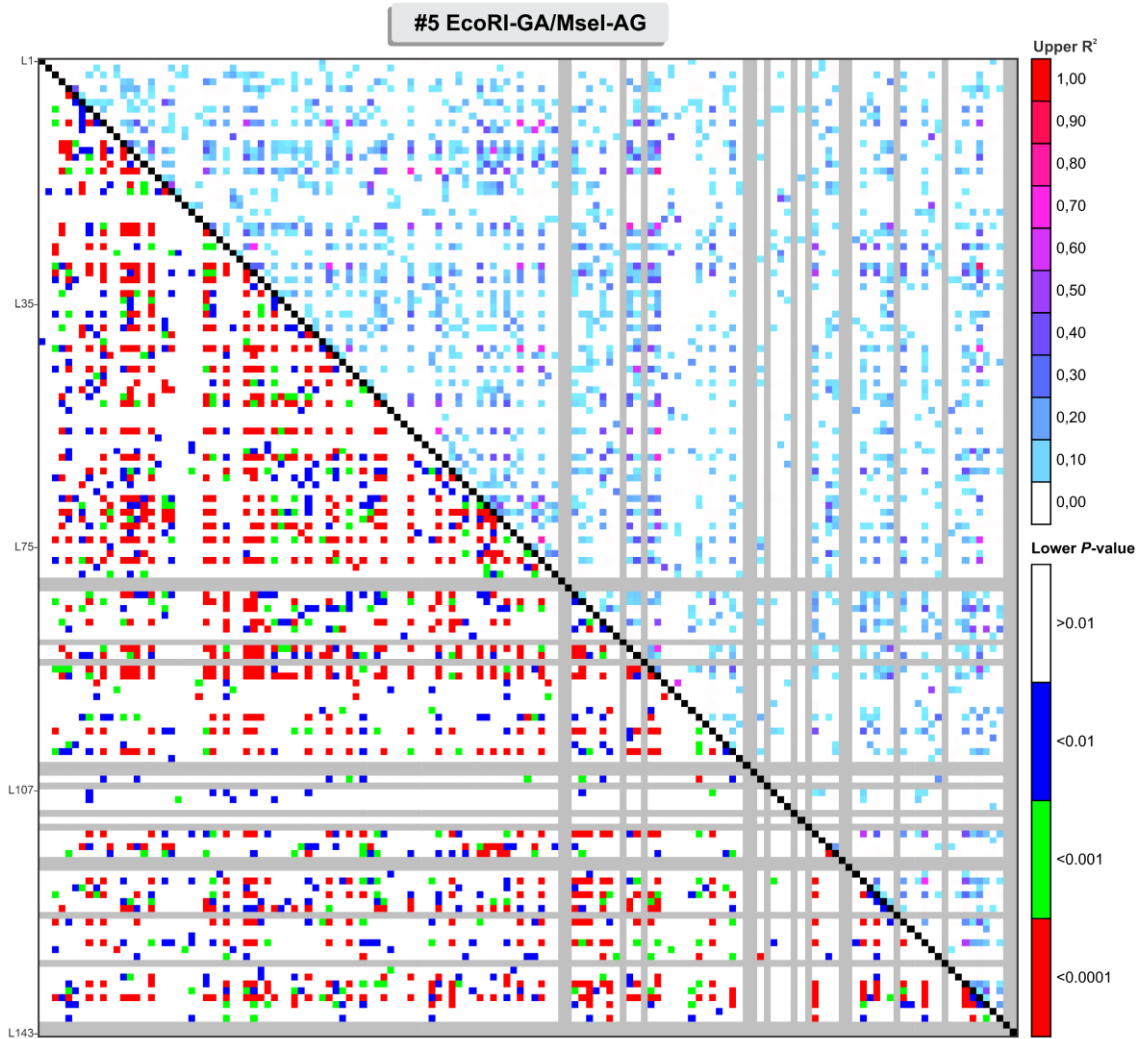

**Supplementary Figure S9.** Disequilibrium matrix for 143 polymorphic AFLP loci based on medically relevant *Sporothrix* species (*S. brasiliensis*, n=72; *S. schenckii*, n=67; *S. globosa*, n=34). Pairwise calculations (10,153 pairs) of linkage disequilibrium (LD) ( $r^2$ ) are displayed above the diagonal with the corresponding  $P$ -values for Fisher's exact test displayed below the diagonal. The colour legends indicate the level of significance ( $P$ -value) and the corresponding strength of LD ( $r^2$ ). The locus position (L) is indicated on the left X-axis. Mean  $r^2 = 0.0370$ . Mean  $D' = 0.6299$ .

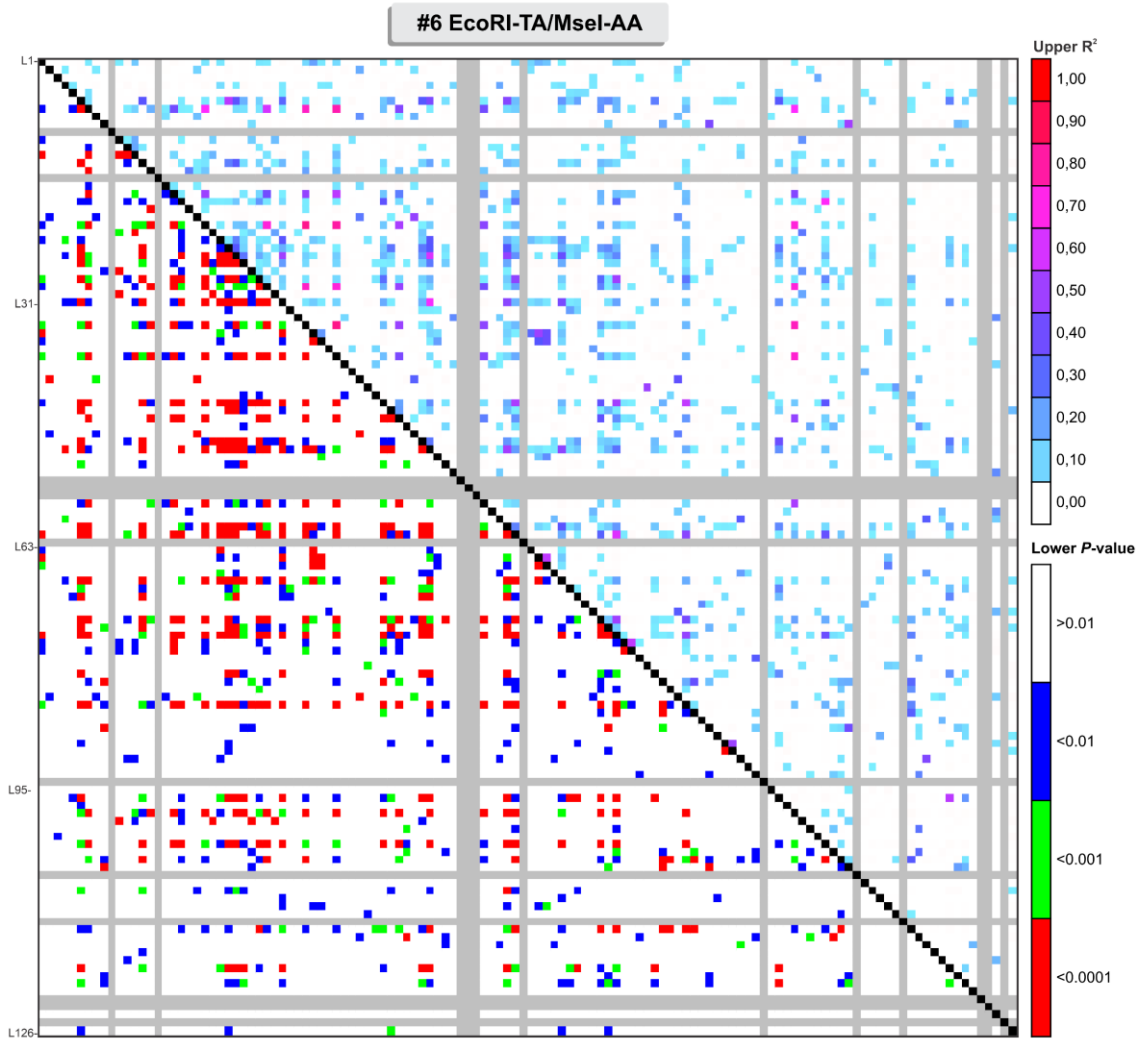

**Supplementary Figure S10.** Disequilibrium matrix for 126 polymorphic AFLP loci based on medically relevant *Sporothrix* species (*S. brasiliensis*, n=72; *S. schenckii*, n=67; *S. globosa*, n=34). Pairwise calculations (7,875 pairs) of linkage disequilibrium (LD) ( $r^2$ ) are displayed above the diagonal with the corresponding  $P$ -values for Fisher's exact test displayed below the diagonal. The colour legends indicate the level of significance ( $P$ -value) and the corresponding strength of LD ( $r^2$ ). The locus position (L) is indicated on the left X-axis. Mean  $r^2 = 0.0271$ . Mean  $D' = 0.7111$ .
